# Supplementary material for: Long-read assembly and comparative evidence-based reanalysis of Cryptosporidium genome sequences reveal expanded transporter repertoire and duplication of entire chromosome ends including subtelomeric regions
Source: HighWire-hosted journal article supplement (doi:10.1101/gr.275325.121), 2021-11-11
Supplement: Supplemental_Tables.xlsx [file Supplemental_Tables.xlsx]

## Sheet: TABLE S1
TABLE S1 - Genomes with annotation available at GenBank
Cryptosporidium Species	# of Genome Sequences Available	Sequencing Technology	# of Genome Annotations Available	Annotation accession numbers
C. parvum	19	Sanger, Illumina, 454, ABI SOLiD, PacBio, ONT, HAPPY map data	2	GCA_000165345.1; GCA_015245375.1
C. hominis	14	Sanger, Illumina, Ion Torrent, 454	5	GCA_002223825.1; GCA_001483515.1; GCA_001593465.1; GCA_001593475.1; GCA_000006425.1
C. ubiquitum	5	Illumina	1	GCA_001865345.1
C. meleagridis	3	Illumina	1	GCA_001593445.1
C. andersoni	3	Illumina	1	GCA_001865355.1
C. muris	1	Sanger and 454	1	GCA_000006515.1
C. tyzzeri	1	Illumina	1	GCA_007210665.1
C. felis	1	Illumina	1	GCA_014529505.1
C. cuniculus	1	Illumina	0	NA
C. ryanae	1	Illumina	0	NA
C. bovis	1	Illumina	0	NA
C. viatorum	1	Illumina	0	NA
C. sp. 37763	1	Illumina	0	NA
C. sp. chipmunk LX-2015	1	Illumina	0	NA
C. baileyi	1	Illumina, PacBio	0	NA

## Sheet: TABLE S2
TABLE S2 - Putatively collapsed regions in Cryptosporidium genome assemblies
Chromosome	C. parvum							C. hominis				C. tyzzeri
	IOWA II location		Compression length	Chromosome	IOWA-ATCC location		Compression length	30976 Contig	30976 location		Compression length	UGA55 Contig	UGA55 location		Compression length
Chr1	694682	694728	46	Chr1	874175	920202	46027	Chr1	131990	132011	21	Chr1	785839	785870	31
Chr2	301621	305130	3509	Chr2	657	745	88		180922	180971	49		870378	870613	235
	649173	649261	88		681607	686953	5346		873440	898797	25357	Chr2	100085	101067	982
	985529	985626	97	Chr3	1102004	1102119	115	Chr2	299771	299799	28		298562	299403	841
Chr3	722	827	105	Chr4	1107739	1107865	126		329173	329222	49		510688	510763	75
	1578	1746	168	Chr5	338	406	68		673318	675400	2082		642751	642822	71
	2199	2595	396		30374	30416	42		978771	978959	188		671806	672735	929
Chr4	635	727	92		298115	298736	621	Chr3	1	293	292		717348	717387	39
	269227	269335	108		1086230	1086301	71		41308	41326	18		747627	747675	48
	1103509	1103862	353	Chr6	565	566	1		79661	79679	18		770165	770202	37
Chr5	9254	9295	41		1308458	1308503	45		194089	194244	155		968316	993097	24781
	276258	277627	1369	Chr7	271970	272006	36		231129	239165	8036	Chr3	12	155	143
	843750	843830	80	Chr8	52	343	291		423795	423870	75		40798	40864	66
	1044508	1079955	35447		1253580	1253621	41		576611	576897	286		78982	79009	27
Chr6	551	562	11						986006	986035	29		181277	181318	41
	1330931	1331318	387						1027414	1036304	8890		221403	221686	283
Chr7	1853	2709	856						1068692	1070191	1499		227117	227139	22
	278265	278302	37					Chr4	53920	54533	613		568509	576526	8017
	685213	685325	112						208811	208901	90		819820	819902	82
Chr8	1042	1594	552						453260	453278	18		1020866	1020928	62
	799096	799126	30						924418	924553	135		1059534	1061370	1836
	1262119	1262152	33						1102283	1102342	59	Chr4	2661	2769	108
								Chr5	6	131	125		61048	61968	920
									27836	27869	33		214614	214705	91
									124539	124551	12		219497	219505	8
									291846	292382	536		340939	341145	206
									423943	424030	87		393620	393834	214
									485428	487301	1873		847021	847058	37
									612335	612357	22		996181	996954	773
									648980	659704	10724		1020435	1020470	35
									723403	723406	3		1107886	1108074	188
									823875	823943	68	Chr5	5761	6623	862
									1076166	1079792	3626		37326	37356	30
								Chr6	172309	172329	20		127407	127430	23
									206266	264187	57921		291653	291777	124
									369502	369512	10		292388	293302	914
									682952	682982	30		483076	484319	1243
									819803	819820	17		493911	493979	68
									1058800	1058804	4		558084	558117	33
									1280313	1298980	18667		571843	571920	77
								Chr7	678044	678826	782		608402	608450	48
									904684	904847	163		889469	889524	55
									1266213	1266351	138	Chr6	51322	51378	56
								Chr8	288161	288162	1		360826	360901	75
									303591	303628	37		812206	812236	30
									648484	648546	62		943908	943963	55
									1038851	1038896	45		1270517	1289179	18662
									1266983	1266986	3	Chr7	1	7487	7486
									1286565	1286573	8		280062	290469	10407
													684565	685514	949
													910781	911038	257
													1188627	1188910	283
													1272355	1272449	94
												Chr8	7	147	140
													302713	302789	76
													461751	461832	81
													648135	648209	74
													726570	726586	16
													1264628	1264646	18

## Sheet: TABLE S3
TABLE S3 - Nucleotide Conservation between CpIA and CpIRef
Chromosome	Number of identical sites	Identity (%)	Conserved Coverage (%)	Conserved length (bp)	# of variants in conserved regions (nt)
Chr1	874914	0.9999	0.951	875536	622
Chr2	984313	0.9999	0.992	984958	645
Chr3	1094474	0.999	0.994	1095827	1353
Chr4	1102583	0.999	0.995	1103386	803
Chr5	1043711	0.999	0.962	1044664	953
Chr6	1303038	0.999	0.979	1304203	1165
Chr7	1270187	0.9998	0.994	1270424	237
Chr8	1327232	0.999	0.988	1328282	1050
Note: CpIA Illumina reads was compared to CpIRef and only 1,079 SNVs are detected of which 654 are SNPs and 435 are indels.

## Sheet: TABLE S4
TABLE S4 – Primers used to validate assembly differences (inversions) found between C. parvum IOWAII and IOWA-ATCC
Chromsome	Primer Name	Sequence	amplicon size (bp)	Template assembly	TM (ºC)	GC%	Chromosome accesion number	Template localization
2	CpIAChr2fwd	5'-TTGAGATACTAACTCTAATGAAGAATTTCC-3'	7830	IOWA-ATCC	53.2	0.3	CP044421	885,073-885,102
2	CpIAChr2rev	5'-AATATCTACAGTATCGTTTCTCCATACACC-3'		IOWA-ATCC	55.9	0.367	CP044421	892,873-892,902
2	CpIRefChr2fwd	5'-AAAAAGTTGAAATTAAATAATGGTGATAGC-3'	4503	IOWAII	52.1	0.233	CM000430	97,024-97,053
2	CpIRefChr2rev	5'-CATCTGAATATGATAGTGACTGTAAAGAGG-3'		IOWAII	54.9	0.367	CM000430	101,497-101,526
4	CpIAChr4fwd-L	5'-AATTAAAGATTTATTTATTCAGGTGTTTGG-3'	7619	IOWA-ATCC	51.8	0.233	CP044419	381,286-381,315
4	CpIAChr4rev-L	5'-AGATTCATGACCATGTATAATAGAATTACG-3'		IOWA-ATCC	53.3	0.3	CP044419	388,875-388,904
4	CpIAChr4fwd-R	5'-TACTTACCCATACCAATACATTTATTATCC-3'	4281	IOWA-ATCC	53	0.3	CP044419	965,262-965,291
4	CpIAChr4rev-R	5'-AACCATTAGCTGTAATAAATAATAATGTGG-3'		IOWA-ATCC	52.6	0.267	CP044419	969,513-969,542
4	CpIRefChr4fwd-L	5'-AATTAAAGATTTATTTATTCAGGTGTTTGG-3'	5273	IOWAII	51.8	0.233	CM000432	381,005-381,034
4	CpIRefChr4rev-L	5'-AGAATCACTAAATTGAATTGAACTAACACC-3'		IOWAII	54.3	0.3	CM000432	386,248-386,277
4	CpIRefChr4fwd-R	5'-TTTAATACCCAGGTAAAATTTCTTAATACC-3'	2220	IOWAII	52.3	0.267	CM000432	963,107-963,136
4	CpIRefChr4rev2-R	5'-AACCATTAGCTGTAATAAATAATAATGTGG-3'		IOWAII	52.6	0.267	CM000432	965,297-965,326
5	CpIAChr5fwd-L	5'-GTATGTTGGTCAACAGTATTTTATTAAACG-3'	8656	IOWA-ATCC	53.5	0.3	CP044418	717,390-717,419
5	CpIAChr5rev-L	5'-TTCACTGTAACTAGATGATGTTTCTTATCC-3'		IOWA-ATCC	54.7	0.333	CP044418	726,016-726,045
5	CpIAChr5fwd-R	5'-ATCATGTGGTATATTTGTATTAATTTCTCC-3'	7524	IOWA-ATCC	52.2	0.267	CP044418	917,932-917,961
5	CpIAChr5rev-R	5'-TTTTTATTAACTTTATTGGAGACTCTTTGC-3'		IOWA-ATCC	53.1	0.267	CP044418	925,426-925,455
5	CpIRefChr5fwd-L	5'-GTATGTTGGTCAACAGTATTTTATTAAACG-3'	6301	IOWAII	53.5	0.3	CM000433	695,578-695,607
5	CpIRefChr5rev-L	5'-TATAGTAAACTGTCATCAACAGATAGAAGC-3'		IOWAII	54.6	0.333	CM000433	701,849-701,878
5	CpIRefChr5fwd-R	5'-ACATAGTAATTTGACCATTATACTCCAAGC-3'	9496	IOWAII	55.2	0.333	CM000433	841,788-841,817
5	CpIRefChr5rev-R	5'-TAAGTCTATAACTTGTTTTACCATGATTCC-3'		IOWAII	53.5	0.3	CM000433	851,254-851,283
5	CpDnmtfwd	5'-ACTGCTAACAATGAGGAAAAATGT-3'	1499	C. parvum control	53.2	0.333	CP044418	475,426-475,449
5	CpDnmtrev	5'-GCATTTCTTTAGGGTGGAAGCA-3'		C. parvum control	55.7	0.455	CP044418	473,951-473-972

## Sheet: TABLE S5
TABLE S5 - Structural comparison between ATCC and other Cryptosporidium genome sequences using NucDiff
Nucdiff Description	IOWAII	C. hominis	C. tyzzeri	C.meleagridis	C.ubiquitum	C.muris	Concept
Total number	2905	235890	202715	619299	478948	3866
Insertions	1020	9473	7406	16535	13231	444	insertion of bases in query sequence that were not present anywhere on the reference genome.
Deletions	542	10550	11461	32116	13132	362	deletion of some bases present in the reference sequence from a query sequence.
Substitutions	1309	215845	183807	570613	452486	2949	substitution of some reference sequence region with another sequence of the same exact length not present anywhere in the reference geome. SNPs can be considered as a subcategory of substitution
Translocations	29	16	31	23	38	36	inter-chromosomal structural rearrangements which occur when regions located on different reference sequences are placed nearby in the same query sequence
Relocations	2	1	3	2	54	17	intra-chromosomal structural rearrangements which occur when regions located in different parts of the same reference sequences are placed nearby in the same query sequence
Reshufflings	1	3	3	2	1	0	intra-chromosomal structural rearrangement which occurs when several neighbouring reference sequence regions are placed in a different order in a query sequence
Inversions	2	1	4	6	1	0	intra-chromosomal structural rearrangement which occurs when a query sequence region is the reverse complement of a reference sequence region.
Unaligned sequences	0	1	0	2	5	58	a query sequence that has no matches of length equal to or longer than a given number of bases qith the reference genome
Uncovered ref regions len	35768	60005	53204	100726	1242181	9084270

## Sheet: TABLE S6
TABLE S6 - Paralogs count among the ortholog groups predicted by Orthofinder*
Orthogroups	#Orthologs/Paralogs					Gene IDs				Product description
	Ch30976	CpIA	CpIRef	CtUGA55	Total	Ch30976	CpIA	CpIRef	CtUGA55
OG0000000	6	6	6	6	24	GY17_00000091-t36_1-p1_GY17_00000455-t36_1-p1_GY17_00001721-t36_1-p1_GY17_00002827-t36_1-p1_GY17_00003495-t36_1-p1_GY17_00003721-t36_1-p1	CPATCC_0000880-RA-p1_CPATCC_0012380-RA-p1_CPATCC_0015970-RA-p1_CPATCC_0018300-RA-p1_CPATCC_0020140-RA-p1_CPATCC_0029500-RA-p1+H4:H90	cgd2_1350-RA-p1_cgd4_1170-RA-p1_cgd4_2540-RA-p1_cgd6_4350-RA-p1_cgd6_920-RA-p1_cgd8_840-RA-p1	CTYZ_00000093-RA-p1_CTYZ_00001267-RA-p1_CTYZ_00001638-RA-p1_CTYZ_00002010-RA-p1_CTYZ_00002200-RA-p1_CTYZ_00002374-RA-p1	26S proteasome subunit P45/AAA+ ATpase
OG0000001	5	5	5	5	20	GY17_00000143-t36_1-p1_GY17_00000854-t36_1-p1_GY17_00001274-t36_1-p1_GY17_00003298-t36_1-p1_GY17_00003385-t36_1-p1	CPATCC_0004320-RA-p1_CPATCC_0006380-RA-p1_CPATCC_0012890-RA-p1_CPATCC_0021510-RA-p1_CPATCC_0036670-RA-p1	cgd1_2650-RA-p1_cgd4_4230-RA-p1_cgd6_1410-RA-p1_cgd7_640-RA-p1_cgd8_4100-RA-p1	CTYZ_00000446-RA-p1_CTYZ_00000656-RA-p1_CTYZ_00001320-RA-p1_CTYZ_00001873-RA-p1_CTYZ_00003856-RA-p1	PRP43 involved in spliceosome disassembly mRNA splicing
OG0000002	5	5	5	5	20	GY17_00001979-t36_1-p1_GY17_00002615-t36_1-p1_GY17_00002964-t36_1-p1_GY17_00003468-t36_1-p1_GY17_00003491-t36_1-p1	CPATCC_0007630-RA-p1_CPATCC_0022620-RA-p1_CPATCC_0029550-RA-p1_CPATCC_0029780-RA-p1_CPATCC_0031880-RA-p1	cgd2_1060-RA-p1_cgd2_1300-RA-p1_cgd3_920-RA-p1_cgd5_820-RA-p1_cgd7_1840-RA-p1	CTYZ_00000784-RA-p1_CTYZ_00002347-RA-p1_CTYZ_00002370-RA-p1_CTYZ_00002807-RA-p1_CTYZ_00003247-RA-p1	Serine/threonine-protein kinase
OG0000003	4	4	4	4	16	GY17_00000402-t36_1-p1_GY17_00000662-t36_1-p1_GY17_00000712-t36_1-p1_GY17_00003542-t36_1-p1	CPATCC_0002410-RA-p1_CPATCC_0002900-RA-p1_CPATCC_0015460-RA-p1_CPATCC_0027090-RA-p1	cgd2_3700-RA-p1_cgd6_3860-RA-p1_cgd8_2300-RA-p1_cgd8_2770-RA-p1	CTYZ_00000249-RA-p1_CTYZ_00000300-RA-p1_CTYZ_00001585-RA-p1_CTYZ_00002622-RA-p1	Bromodomain/HAS/DEXDc/SNF2 domain containing protein
OG0000004	4	4	4	4	16	GY17_00001001-t36_1-p1_GY17_00001440-t36_1-p1_GY17_00002674-t36_1-p1_GY17_00003277-t36_1-p1	CPATCC_0006170-RA-p1_CPATCC_0024320-RA-p1_CPATCC_0032470-RA-p1_CPATCC_0039350-RA-p1	cgd1_60-RA-p1_cgd3_1510-RA-p1_cgd5_2510-RA-p1_cgd7_430-RA-p1	CTYZ_00000635-RA-p1_CTYZ_00002867-RA-p1_CTYZ_00003426-RA-p1_CTYZ_00003585-RA-p1	Tyrosine-protein kinase
OG0000005	4	4	4	4	16	GY17_00001243-t36_1-p1_GY17_00001540-t36_1-p1_GY17_00002067-t36_1-p1_GY17_00003316-t36_1-p1	CPATCC_0006560-RA-p1_CPATCC_0008480-RA-p1_CPATCC_0025360-RA-p1_CPATCC_0036980-RA-p1	cgd1_2360-RA-p1_cgd5_4070-RA-p1_cgd7_2670-RA-p1_cgd7_810-RA-p1	CTYZ_00000674-RA-p1_CTYZ_00000871-RA-p1_CTYZ_00003527-RA-p1_CTYZ_00003824-RA-p1	Serine/threonine phosphatase
OG0000006	3	3	3	3	12	GY17_00001287-t36_1-p1_GY17_00002759-t36_1-p1_GY17_00003091-t36_1-p1	CPATCC_0000170-RA-p1_CPATCC_0009550-RA-p1_CPATCC_0036540-RA-p1	cgd1_2770-RA-p1_cgd7_3720-RA-p1_cgd8_170-RA-p1	CTYZ_00000018-RA-p1_CTYZ_00000978-RA-p1_CTYZ_00003869-RA-p1	DNA-directed RNA polymerase subunit beta
OG0000007	1	4	4	3	12	GY17_00002812-t36_1-p1	CPATCC_0000700-RA-p1_CPATCC_0000710-RA-p1_CPATCC_0000720-RA-p1_CPATCC_0000730-RA-p1	cgd8_660-RA-p1_cgd8_670-RA-p1_cgd8_680-RA-p1_cgd8_690-RA-p1	CTYZ_00000073-RA-p1_CTYZ_00000075-RA-p1_CTYZ_00003985-RA-p1	Uncharacterized protein
OG0000008	3	3	3	3	12	GY17_00000603-t36_1-p1_GY17_00001640-t36_1-p1_GY17_00002437-t36_1-p1	CPATCC_0001830-RA-p1_CPATCC_0011450-RA-p1_CPATCC_0026330-RA-p1	cgd5_3570-RA-p1_cgd7_5500-RA-p1_cgd8_1740-RA-p1	CTYZ_00000187-RA-p1_CTYZ_00001173-RA-p1_CTYZ_00003992-RA-p1	Secreted GGC gene family protein
OG0000009	3	3	3	3	12	GY17_00000612-t36_1-p1_GY17_00001091-t36_1-p1_GY17_00003116-t36_1-p1	CPATCC_0001920-RA-p1_CPATCC_0009780-RA-p1_CPATCC_0038480-RA-p1	cgd1_880-RA-p1_cgd7_3940-RA-p1_cgd8_1820-RA-p1	CTYZ_00000196-RA-p1_CTYZ_00001004-RA-p1_CTYZ_00003674-RA-p1	ATP-dependent RNA helicase,putative
OG0000010	3	3	3	3	12	GY17_00000004-t36_1-p1_GY17_00000993-t36_1-p1_GY17_00003978-t36_1-p1	CPATCC_0005690-RA-p1_CPATCC_0011510-RA-p1_CPATCC_0039470-RA-p1	cgd5_4530-RA-p1_cgd6_30-RA-p1_cgd8_5400-RA-p1	CTYZ_00000585-RA-p1_CTYZ_00001178-RA-p1_CTYZ_00002694-RA-p1	Uncharacterized protein
OG0000011	3	3	3	3	12	GY17_00002573-t36_1-p1_GY17_00003270-t36_1-p1_GY17_00003686-t36_1-p1	CPATCC_0006100-RA-p1_CPATCC_0030410-RA-p1_CPATCC_0034460-RA-p1	cgd2_20-RA-p1_cgd3_3440-RA-p1_cgd7_360-RA-p1	CTYZ_00000627-RA-p1_CTYZ_00002240-RA-p1_CTYZ_00003068-RA-p1	Heat shock protein 70
OG0000012	3	3	3	3	12	GY17_00000500-t36_1-p1_GY17_00001757-t36_1-p1_GY17_00001992-t36_1-p1	CPATCC_0007760-RA-p1_CPATCC_0016390-RA-p1_CPATCC_0019790-RA-p1	cgd4_2860-RA-p1_cgd6_4760-RA-p1_cgd7_1980-RA-p1	CTYZ_00000797-RA-p1_CTYZ_00001681-RA-p1_CTYZ_00002046-RA-p1	Tubulin/GTPase domain containing protein
OG0000013	3	3	3	3	12	GY17_00001030-t36_1-p1_GY17_00003334-t36_1-p1_GY17_00003876-t36_1-p1	CPATCC_0020990-RA-p1_CPATCC_0023790-RA-p1_CPATCC_0039070-RA-p1	cgd1_330-RA-p1_cgd4_1730-RA-p1_cgd5_2010-RA-p1	CTYZ_00001924-RA-p1_CTYZ_00003367-RA-p1_CTYZ_00003614-RA-p1	AAA+ ATPase
OG0000014	3	3	3	3	12	GY17_00001096-t36_1-p1_GY17_00001418-t36_1-p1_GY17_00001598-t36_1-p1	CPATCC_0024140-RA-p1_CPATCC_0025920-RA-p1_CPATCC_0038430-RA-p1	cgd1_920-RA-p1_cgd5_2330-RA-p1_cgd5_3160-RA-p1	CTYZ_00003405-RA-p1_CTYZ_00003679-RA-p1_CTYZ_00004034-RA-p1	Actin
OG0000015	3	3	3	3	12	GY17_00001602-t36_1-p1_GY17_00001816-t36_1-p1_GY17_00003863-t36_1-p1	CPATCC_0019180-RA-p1_CPATCC_0025950-RA-p1_CPATCC_0031530-RA-p1	cgd3_640-RA-p1_cgd4_3400-RA-p1_cgd5_3200-RA-p1	CTYZ_00002106-RA-p1_CTYZ_00002773-RA-p1_CTYZ_00004030-RA-p1	AMP-dependent synthetase/ligase
OG0000016	1	4	4	2	11	GY17_00003970-t36_1-p1	CPATCC_0021790-RA-p1_CPATCC_0021800-RA-p1_CPATCC_0039540-RA-p1_CPATCC_0039550-RA-p1	cgd5_4600-RA-p1_cgd5_4610-RA-p1_cgd6_5480-RA-p1_cgd6_5490-RA-p1	CTYZ_00002702-RA-p1_CTYZ_00003166-RA-p1	Uncharacterized protein (MEDLE gene family)
OG0000017	3	3	2	2	10	GY17_00002743-t36_1-p1_GY17_00003971-t36_1-p1_GY17_00003972-t36_1-p1	CPATCC_0000010-RA-p1_CPATCC_0017070-RA-p1_CPATCC_0021780-RA-p1	cgd6_5500-RA-p1_cgd8_10-RA-p1	CTYZ_00000001-RA-p1_CTYZ_00003165-RA-p1	Uncharacterized protein
OG0000018	3	1	3	3	10	GY17_00000575-t36_1-p1_GY17_00000575-t36_2-p1_GY17_00000575-t36_3-p1	CPATCC_0001550-RA-p1	cgd8_1490-RA-p1_cgd8_1490-RB-p1_cgd8_1490-RC-p1	CTYZ_00000160-RA-p1_CTYZ_00000160-RB-p1_CTYZ_00000160-RC-p1	Tyrosine/serine-protein phosphatase IphP-type
OG0000019	4	2	2	2	10	GY17_00001761-t36_1-p1_GY17_00002742-t36_1-p1_GY17_00003988-t36_1-p1_GY17_00003992-t36_1-p1	CPATCC_0019760-RA-p1_CPATCC_0033150-RA-p1	cgd3_2180-RA-p1_cgd4_2900-RA-p1	CTYZ_00002051-RA-p1_CTYZ_00002935-RA-p1	Polyketide synthase
OG0000020	2	3	3	2	10	GY17_00003823-t36_1-p1_GY17_00003986-t36_1-p1	CPATCC_0017080-RA-p1_CPATCC_0035280-RA-p1_CPATCC_0035290-RA-p1	cgd3_4260-RA-p1_cgd3_4270-RA-p1_cgd6_5520-RA-p1	CTYZ_00003152-RA-p1_CTYZ_00003986-RA-p1	Metalloenzyme,LuxS/M16 peptidase-like
OG0000021	2	2	2	2	8	GY17_00001400-t36_1-p1_GY17_00002744-t36_1-p1	CPATCC_0000020-RA-p1_CPATCC_0035410-RA-p1	cgd1_3850-RA-p1_cgd8_20-RA-p1	CTYZ_00000002-RA-p1_CTYZ_00003983-RA-p1	Uncharacterized Secreted Protein (SKSR gene family)
OG0000022	2	2	2	2	8	GY17_00001211-t36_1-p1_GY17_00002846-t36_1-p1	CPATCC_0001080-RA-p1_CPATCC_0037290-RA-p1	cgd1_2060-RA-p1_cgd8_1040-RA-p1	CTYZ_00000113-RA-p1_CTYZ_00003793-RA-p1	Ras
OG0000023	2	2	2	2	8	GY17_00000567-t36_1-p1_GY17_00002681-t36_1-p1	CPATCC_0001470-RA-p1_CPATCC_0032540-RA-p1	cgd3_1580-RA-p1_cgd8_1420-RA-p1	CTYZ_00000152-RA-p1_CTYZ_00002873-RA-p1	Secreted Glycoside hydrolase superfamily 31
OG0000024	2	2	2	2	8	GY17_00000665-t36_1-p1_GY17_00001104-t36_1-p1	CPATCC_0002440-RA-p1_CPATCC_0038360-RA-p1	cgd1_990-RA-p1_cgd8_2330-RA-p1	CTYZ_00000252-RA-p1_CTYZ_00003686-RA-p1	Pyridine nucleotide/ NAD(P) transhydrogenase alpha plus beta subunit
OG0000025	2	2	2	2	8	GY17_00000729-t36_1-p1_GY17_00003784-t36_1-p1	CPATCC_0003070-RA-p1_CPATCC_0034890-RA-p1	cgd3_3880-RA-p1_cgd8_2930-RA-p1	CTYZ_00000318-RA-p1_CTYZ_00003113-RA-p1	GTpase translation elongation factor 2
OG0000026	2	2	2	2	8	GY17_00001967-t36_1-p1_GY17_00003263-t36_1-p1	CPATCC_0006030-RA-p1_CPATCC_0007510-RA-p1	cgd7_1730-RA-p1_cgd7_300-RA-p1	CTYZ_00000620-RA-p1_CTYZ_00000772-RA-p1	cpP2 extracellular protein with a signal peptide
OG0000027	2	2	2	2	8	GY17_00003281-t36_1-p1_GY17_00003282-t36_1-p1	CPATCC_0006210-RA-p1_CPATCC_0006220-RA-p1	cgd7_470-RA-p1_cgd7_480-RA-p1	CTYZ_00000639-RA-p1_CTYZ_00000640-RA-p1	type 3 Malate dehydrogenase
OG0000028	2	2	2	2	8	GY17_00000200-t36_1-p1_GY17_00001920-t36_1-p1	CPATCC_0007040-RA-p1_CPATCC_0013470-RA-p1	cgd6_1960-RA-p1_cgd7_1310-RA-p1	CTYZ_00000724-RA-p1_CTYZ_00001378-RA-p1	Glycosyltransferase 2-like protein
OG0000029	2	2	2	2	8	GY17_00001961-t36_1-p1_GY17_00002921-t36_1-p1	CPATCC_0007450-RA-p1_CPATCC_0022190-RA-p1	cgd5_410-RA-p1_cgd7_1690-RA-p1	CTYZ_00000766-RA-p1_CTYZ_00003205-RA-p1	Rad51/DMC1/RadA DNA repair Protein
OG0000030	2	2	2	2	8	GY17_00000213-t36_1-p1_GY17_00001975-t36_1-p1	CPATCC_0007590-RA-p1_CPATCC_0013600-RA-p1	cgd6_2090-RA-p1_cgd7_1800-RA-p1	CTYZ_00000780-RA-p1_CTYZ_00001390-RA-p1	Chitin-binding type-2 domain containing protein
OG0000031	2	2	2	2	8	GY17_00002004-t36_1-p1_GY17_00002947-t36_1-p1	CPATCC_0007880-RA-p1_CPATCC_0022460-RA-p1	cgd5_670-RA-p1_cgd7_2090-RA-p1	CTYZ_00000809-RA-p1_CTYZ_00003229-RA-p1	RuvB-like helicase
OG0000032	2	2	2	2	8	GY17_00003035-t36_1-p1_GY17_00003636-t36_1-p1	CPATCC_0008990-RA-p1_CPATCC_0023670-RA-p1	cgd5_1880-RA-p1_cgd7_3180-RA-p1	CTYZ_00000922-RA-p1_CTYZ_00003354-RA-p1	Chaperonin pn60/Tp-1
OG0000033	2	2	2	2	8	GY17_00003086-t36_1-p1_GY17_00003937-t36_1-p1	CPATCC_0009500-RA-p1_CPATCC_0034780-RA-p1	cgd3_3770-RA-p1_cgd7_3670-RA-p1	CTYZ_00000973-RA-p1_CTYZ_00003102-RA-p1	Heat shock protein Hsp90
OG0000034	2	2	2	2	8	GY17_00002318-t36_1-p1_GY17_00003099-t36_1-p1	CPATCC_0009620-RA-p1_CPATCC_0010240-RA-p1	cgd7_3790-RA-p1_cgd7_4350-RA-p1	CTYZ_00000986-RA-p1_CTYZ_00001050-RA-p1	Myosin motor domain containing protein
OG0000035	2	2	2	2	8	GY17_00002297-t36_1-p1_GY17_00002949-t36_1-p1	CPATCC_0010030-RA-p1_CPATCC_0022480-RA-p1	cgd5_690-RA-p1_cgd7_4160-RA-p1	CTYZ_00001028-RA-p1_CTYZ_00003231-RA-p1	Glycosyltransferase 2-like
OG0000036	2	2	2	2	8	GY17_00001417-t36_1-p1_GY17_00002306-t36_1-p1	CPATCC_0010120-RA-p1_CPATCC_0024130-RA-p1	cgd5_2320-RA-p1_cgd7_4240-RA-p1	CTYZ_00001037-RA-p1_CTYZ_00003404-RA-p1	Prohibitin
OG0000037	2	2	2	2	8	GY17_00002334-t36_1-p1_GY17_00002335-t36_1-p1	CPATCC_0010390-RA-p1_CPATCC_0010400-RA-p1	cgd7_4510-RA-p1_cgd7_4520-RA-p1	CTYZ_00001066-RA-p1_CTYZ_00001067-RA-p1	ABC transporter
OG0000038	2	2	2	2	8	GY17_00000009-t36_1-p1_GY17_00000140-t36_1-p1	CPATCC_0011560-RA-p1_CPATCC_0012860-RA-p1	cgd6_1380-RA-p1_cgd6_80-RA-p1	CTYZ_00001183-RA-p1_CTYZ_00001317-RA-p1	Histone deacetylase
OG0000039	2	2	2	2	8	GY17_00000014-t36_1-p1_GY17_00000015-t36_1-p1	CPATCC_0011610-RA-p1_CPATCC_0011620-RA-p1	cgd6_130-RA-p1_cgd6_140-RA-p1	CTYZ_00001188-RA-p1_CTYZ_00001189-RA-p1	Cation/H+ exchanger (CPA1)
OG0000040	2	2	2	2	8	GY17_00000243-t36_1-p1_GY17_00003001-t36_1-p1	CPATCC_0013910-RA-p1_CPATCC_0022990-RA-p1	cgd5_1180-RA-p1_cgd6_2390-RA-p1	CTYZ_00001422-RA-p1_CTYZ_00003284-RA-p1	DNA topoisomerase
OG0000041	2	2	2	2	8	GY17_00000334-t36_1-p1_GY17_00000399-t36_1-p1	CPATCC_0014790-RA-p1_CPATCC_0015430-RA-p1	cgd6_3220-RA-p1_cgd6_3830-RA-p1	CTYZ_00001516-RA-p1_CTYZ_00001582-RA-p1	RAS small GTPase Rab1 family
OG0000042	2	2	2	2	8	GY17_00000342-t36_1-p1_GY17_00002488-t36_1-p1	CPATCC_0014870-RA-p1_CPATCC_0033620-RA-p1	cgd3_2620-RA-p1_cgd6_3290-RA-p1	CTYZ_00001524-RA-p1_CTYZ_00002982-RA-p1	DNA-directed RNA polymerase subunit
OG0000043	2	2	2	2	8	GY17_00002649-t36_1-p1_GY17_00002888-t36_1-p1	CPATCC_0021870-RA-p1_CPATCC_0032220-RA-p1	cgd3_1270-RA-p1_cgd5_60-RA-p1	CTYZ_00002841-RA-p1_CTYZ_00003174-RA-p1	Centrin like protein with 4x EF hands
OG0000044	2	2	2	2	8	GY17_00001617-t36_1-p1_GY17_00003752-t36_1-p1	CPATCC_0026100-RA-p1_CPATCC_0026660-RA-p1	cgd2_4120-RA-p1_cgd5_3350-RA-p1	CTYZ_00002666-RA-p1_CTYZ_00004015-RA-p1	cyclophilin peptidyl-prolyl cis-trans isomerase
OG0000045	2	2	2	2	8	GY17_00001797-t36_1-p1_GY17_00002480-t36_1-p1	CPATCC_0019390-RA-p1_CPATCC_0033540-RA-p1	cgd3_2540-RA-p1_cgd4_3220-RA-p1	CTYZ_00002087-RA-p1_CTYZ_00002974-RA-p1	Histone H3
OG0000046	2	2	2	2	8	GY17_00003701-t36_1-p1_GY17_00003702-t36_1-p1	CPATCC_0018490-RA-p1_CPATCC_0018500-RA-p1	cgd4_1370-RA-p1_cgd4_1380-RA-p1	CTYZ_00002179-RA-p1_CTYZ_00002180-RA-p1	ABC transporter
OG0000047	2	2	2	2	8	GY17_00003132-t36_1-p1_GY17_00003133-t36_1-p1	CPATCC_0018050-RA-p1_CPATCC_0018060-RA-p1	cgd4_910-RA-p1_cgd4_920-RA-p1	CTYZ_00002225-RA-p1_CTYZ_00002226-RA-p1	Histidine phosphatase superfamily clade-2
OG0000048	3	1	3	1	8	GY17_00003381-t36_1-p1_GY17_00003381-t36_2-p1_GY17_00003381-t36_3-p1	CPATCC_0021470-RA-p1	cgd4_4160-RA-p1_cgd4_4170-RA-p1_cgd4_4180-RA-p1	CTYZ_00001877-RA-p1	Uncharacterized protein
OG0000049	2	2	2	2	8	GY17_00003406-t36_1-p1_GY17_00003952-t36_1-p1	CPATCC_0021710-RA-p1_CPATCC_0035370-RA-p1	cgd3_4350-RA-p1_cgd4_4450-RA-p1	CTYZ_00001851-RA-p1_CTYZ_00003161-RA-p1	Transmembrane amino acid transporter protein
OG0000050	2	2	2	2	8	GY17_00002703-t36_1-p1_GY17_00003898-t36_1-p1	CPATCC_0030890-RA-p1_CPATCC_0032770-RA-p1	cgd3_1810-RA-p1_cgd3_40-RA-p1	CTYZ_00002708-RA-p1_CTYZ_00002895-RA-p1	casein kinase I
OG0000051	2	2	2	2	8	GY17_00002586-t36_1-p1_GY17_00003907-t36_1-p1	CPATCC_0030980-RA-p1_CPATCC_0034580-RA-p1	cgd3_130-RA-p1_cgd3_3580-RA-p1	CTYZ_00002717-RA-p1_CTYZ_00003082-RA-p1	DRG like OBG family Gtpase with TGS domain
OG0000052	5	1	1	1	8	GY17_00002592-t36_1-p1_GY17_00002593-t36_1-p1_GY17_00003960-t36_1-p1_GY17_00003961-t36_1-p1_GY17_00003979-t36_1-p1	CPATCC_0031660-RA-p1	cgd3_720-RA-p1	CTYZ_00002785-RA-p1	mucin
OG0000053	2	2	2	2	8	GY17_00002608-t36_1-p1_GY17_00003513-t36_1-p1	CPATCC_0027380-RA-p1_CPATCC_0031810-RA-p1	cgd2_3410-RA-p1_cgd3_860-RA-p1	CTYZ_00002590-RA-p1_CTYZ_00002800-RA-p1	ARF1/2 like small Gtpase
OG0000054	2	2	2	2	8	GY17_00002166-t36_1-p1_GY17_00002663-t36_1-p1	CPATCC_0028680-RA-p1_CPATCC_0032360-RA-p1	cgd2_2130-RA-p1_cgd3_1400-RA-p1	CTYZ_00002458-RA-p1_CTYZ_00002855-RA-p1	ATP-dependent 6-phosphofructokinase
OG0000055	2	2	2	2	8	GY17_00003463-t36_1-p1_GY17_00003929-t36_1-p1	CPATCC_0029830-RA-p1_CPATCC_0034700-RA-p1	cgd2_1010-RA-p1_cgd3_3690-RA-p1	CTYZ_00002342-RA-p1_CTYZ_00003094-RA-p1	DEAD/DEAH box helicase
OG0000056	2	2	2	2	8	GY17_00003679-t36_1-p1_GY17_00003681-t36_1-p1	CPATCC_0030460-RA-p1_CPATCC_0030480-RA-p1	cgd2_70-RA-p1_cgd2_90-RA-p1	CTYZ_00002245-RA-p1_CTYZ_00002247-RA-p1	ABC transporter
OG0000057	2	2	2	2	8	GY17_00003454-t36_1-p1_GY17_00003455-t36_1-p1	CPATCC_0029910-RA-p1_CPATCC_0029920-RA-p1	cgd2_920-RA-p1_cgd2_930-RA-p1	CTYZ_00002333-RA-p1_CTYZ_00002334-RA-p1	insulinase-like peptidase
OG0000058	2	2	2	2	8	GY17_00002221-t36_1-p1_GY17_00002222-t36_1-p1	CPATCC_0028120-RA-p1_CPATCC_0028130-RA-p1	cgd2_2660-RA-p1_cgd2_2670-RA-p1	CTYZ_00002514-RA-p1_CTYZ_00002515-RA-p1	UDP N-acetylglucosamine transporter-like nucleotide sugar transporter
OG0000059	1	1	1	4	7	GY17_00003429-t36_1-p1	CPATCC_0030170-RA-p1	cgd2_690-RA-p1	CTYZ_00002307-RA-p1_CTYZ_00002308-RA-p1_CTYZ_00002698-RA-p1_CTYZ_00002700-RA-p1	SPX/RING-type Zinc finger domain containing protein
OG0000060	1	3	2	1	7	GY17_00003994-t36_1-p1	CPATCC_0027530-RA-p1_CPATCC_0027530-RB-p1_CPATCC_0027530-RC-p1	cgd2_3260-RA-p1_cgd2_3270-RA-p1	CTYZ_00002575-RA-p1	Phosphoglucomutase
OG0000061	2	1	2	1	6	GY17_00000626-t36_1-p1_GY17_00000626-t36_2-p1	CPATCC_0002060-RA-p1	cgd8_1950-RA-p1_cgd8_1950-RB-p1	CTYZ_00000211-RA-p1	Pre-mRNA-splicing factor cwf15/wc15
OG0000062	1	2	2	1	6	GY17_00001497-t36_1-p1	CPATCC_0024920-RA-p1_CPATCC_0024930-RA-p1	cgd5_4480-RA-p1_cgd5_4490-RA-p1	CTYZ_00003484-RA-p1	Uncharacterized protein with WD40 repreat
OG0000063	2	1	1	2	6	GY17_00001831-t36_1-p1_GY17_00001832-t36_1-p1	CPATCC_0019040-RA-p1	cgd4_3550-RA-p1	CTYZ_00002121-RA-p1_CTYZ_00002122-RA-p1	Secreted Kazal domain-containing protein
OG0000064	1	1	2	2	6	GY17_00003736-t36_1-p1	CPATCC_0018140-RA-p1	cgd4_1010-RA-p1_cgd4_1020-RA-p1	CTYZ_00002215-RA-p1_CTYZ_00002216-RA-p1	Nucleolar pre-ribosomal-associated protein 1 C-terminal domain containing protein
OG0000065	1	1	1	2	5	GY17_00002745-t36_1-p1	CPATCC_0000030-RA-p1	cgd8_30-RA-p1	CTYZ_00000003-RA-p1_CTYZ_00000004-RA-p1	Uncharacterized Secreted Protein (SKSR gene family)
OG0000066	1	1	1	2	5	GY17_00002776-t36_1-p1	CPATCC_0000340-RA-p1	cgd8_320-RA-p1	CTYZ_00000035-RA-p1_CTYZ_00000036-RA-p1	Uncharacterized protein
OG0000067	1	1	1	2	5	GY17_00000628-t36_1-p1	CPATCC_0002080-RA-p1	cgd8_1970-RA-p1	CTYZ_00000213-RA-p1_CTYZ_00000214-RA-p1	ATP-NAD kinase
OG0000068	1	1	1	2	5	GY17_00000989-t36_1-p1	CPATCC_0005650-RA-p1	cgd8_5360-RA-p1	CTYZ_00000580-RA-p1_CTYZ_00000581-RA-p1	Uncharacterized protein
OG0000069	2	1	1	1	5	GY17_00000030-t36_1-p1_GY17_00000031-t36_1-p1	CPATCC_0011770-RA-p1	cgd6_300-RA-p1	CTYZ_00001205-RA-p1	Uncharacterized protein
OG0000070	1	1	1	2	5	GY17_00000081-t36_1-p1	CPATCC_0012280-RA-p1	cgd6_830-RA-p1	CTYZ_00001255-RA-p1_CTYZ_00001256-RA-p1	Pleckstrin homology domain containing protein
OG0000071	2	1	1	1	5	GY17_00000411-t36_1-p1_GY17_00000412-t36_1-p1	CPATCC_0015550-RA-p1	cgd6_3940-RA-p1	CTYZ_00001594-RA-p1	Uncharacterized protein
OG0000072	1	1	2	1	5	GY17_00002909-t36_1-p1	CPATCC_0022070-RA-p1	cgd5_260-RA-p1_cgd5_270-RA-p1	CTYZ_00003194-RA-p1	Tetratricopeptide-like_helical_domain_containing_protein
OG0000073	2	1	1	1	5	GY17_00003641-t36_1-p1_GY17_00003867-t36_1-p1	CPATCC_0023710-RA-p1	cgd5_1930-RA-p1	CTYZ_00003359-RA-p1	Pleckstrin homology (PH) domain containing protein
OG0000074	1	1	1	2	5	GY17_00001641-t36_1-p1	CPATCC_0026340-RA-p1	cgd5_3580-RA-p1	CTYZ_00001756-RA-p1_CTYZ_00003991-RA-p1	SbmA/BacA-like family (AB
OG0000075	1	1	1	2	5	GY17_00001642-t36_1-p1	CPATCC_0026350-RA-p1	cgd5_3590-RA-p1	CTYZ_00001755-RA-p1_CTYZ_00003990-RA-p1	SbmA/BacA-like family (AB
OG0000076	1	1	1	2	5	GY17_00001643-t36_1-p1	CPATCC_0026360-RA-p1	cgd5_3600-RA-p1	CTYZ_00001754-RA-p1_CTYZ_00003988-RA-p1	Uncharacterized Secreted Protein (FLGN gene family)
OG0000077	1	1	1	2	5	GY17_00001871-t36_1-p1	CPATCC_0018660-RA-p1	cgd4_1530-RA-p1	CTYZ_00002162-RA-p1_CTYZ_00002163-RA-p1	Phospholipase/carboxylesterase
OG0000078	1	1	1	2	5	GY17_00001873-t36_1-p1	CPATCC_0018630-RA-p1	cgd4_1510-RA-p1	CTYZ_00002165-RA-p1_CTYZ_00002166-RA-p1	Decaprenyl diphosphate synthase-like
OG0000079	1	1	1	2	5	GY17_00003713-t36_1-p1	CPATCC_0018380-RA-p1	cgd4_1250-RA-p1	CTYZ_00002191-RA-p1_CTYZ_00002192-RA-p1	Uncharacterized protein
OG0000080	1	1	1	2	5	GY17_00003958-t36_1-p1	CPATCC_0031640-RA-p1	cgd3_693-RA-p1	CTYZ_00002782-RA-p1_CTYZ_00002783-RA-p1	Uncharacterized protein
OG0000081	1	2	1	1	5	GY17_00002238-t36_1-p1	CPATCC_0027960-RA-p1_CPATCC_0027960-RB-p1	cgd2_2830-RA-p1	CTYZ_00002533-RA-p1	coenzyme Q3/methyltransferase
OG0000082	2	1	1	1	5	GY17_00001009-t36_1-p1_GY17_00001010-t36_1-p1	CPATCC_0039270-RA-p1	cgd1_140-RA-p1	CTYZ_00003593-RA-p1	Uncharacterized Secreted Protein (cpLSP gene family)
OG0000083	2	1	1	1	5	GY17_00001075-t36_1-p1_GY17_00001075-t36_2-p1	CPATCC_0038640-RA-p1	cgd1_733-RA-p1	CTYZ_00003658-RA-p1	Uncharacterized Protein
OG0000084	1	1	1	2	5	GY17_00001222-t36_1-p1	CPATCC_0037180-RA-p1	cgd1_2170-RA-p1	CTYZ_00003804-RA-p1_CTYZ_00003804-RB-p1	SET domain containing protein
OG0000085	1	2	1	1	5	GY17_00001383-t36_1-p1	CPATCC_0035590-RA-p1_CPATCC_0035590-RB-p1	cgd1_3680-RA-p1	CTYZ_00003966-RA-p1	EGF-like domain containing protein
OG0003712	0	1	1	3	5		CPATCC_0017080-RA-p1	cgd6_5510-RA-p1	CTYZ_00001752-RA-p1_CTYZ_00002701-RA-p1_CTYZ_00003164-RA-p1	Metalloenzyme,LuxS/M16 peptidase-like
OG0003794	1	0	0	2	3	GY17_00003944-t36_1-p1			CTYZ_00003153-RA-p1_CTYZ_00003987-RA-p1	Insulinase (Peptidase family M16)
OG0003806	0	2	1	0	3		CPATCC_0039440-RA-p1_CPATCC_0039450-RA-p1	cgd5_4510-RA-p1		Uncharacterized protein
*Putative copy numbers of genes found in compressed regions as detected by read depth coverage analysis are not included in this analysis

## Sheet: TABLE S7
TABLE S7 - Genes that appear unique, but aren't and the reason why
Gene ID	Unique Gene?	Origin/Reason Why*
CPATCC_0000730	No	Ortholog found in the other species
CPATCC_0001030	No	Assembly complex region (within or in other species)
CPATCC_0001060	No	Assembly complex region (within or in other species)
CPATCC_0001670	No	Assembly complex region (within or in other species)
CPATCC_0001680	No	Assembly complex region (within or in other species)
CPATCC_0001860	No	Assembly complex region (within or in other species)
CPATCC_0003210	No	Putative split gene in other species
CPATCC_0003760	No	Assembly complex region (within or in other species)
CPATCC_0004730	No	Assembly complex region (within or in other species)
CPATCC_0005710	No	Assembly complex region (within or in other species)
CPATCC_0005860	No	Assembly complex region (within or in other species)
CPATCC_0007010	No	Assembly complex region (within or in other species)
CPATCC_0007100	No	Assembly complex region (within or in other species)
CPATCC_0008290	No	Assembly complex region (within or in other species)
CPATCC_0009960	No	Assembly complex region (within or in other species)
CPATCC_0010830	No	Putative split gene in other species
CPATCC_0011050	No	Assembly complex region (within or in other species)
CPATCC_0011480	No	Assembly complex region (within or in other species)
CPATCC_0011980	No	Putative split gene in other species
CPATCC_0012730	No	Putative split gene in other species
CPATCC_0013450	No	Assembly complex region (within or in other species)
CPATCC_0016570	No	Assembly complex region (within or in other species)
CPATCC_0017070	No	Ortholog found in the other species
CPATCC_0018220	No	Assembly complex region (within or in other species)
CPATCC_0018640	No	Assembly complex region (within or in other species)
CPATCC_0019310	No	Assembly complex region (within or in other species)
CPATCC_0019340	No	Assembly complex region (within or in other species)
CPATCC_0019620	No	Assembly complex region (within or in other species)
CPATCC_0020920	No	Assembly complex region (within or in other species)
CPATCC_0021380	No	Assembly complex region (within or in other species)
CPATCC_0022130	No	Putative split gene in other species
CPATCC_0022260	No	Assembly complex region (within or in other species)
CPATCC_0022690	No	Assembly complex region (within or in other species)
CPATCC_0024070	No	Putative split gene in other species
CPATCC_0024910	No	Putative split gene in other species
CPATCC_0025470	No	Assembly complex region (within or in other species)
CPATCC_0025580	No	Assembly complex region (within or in other species)
CPATCC_0026010	No	Assembly complex region (within or in other species)
CPATCC_0026040	No	Assembly complex region (within or in other species)
CPATCC_0027100	No	Assembly complex region (within or in other species)
CPATCC_0027960	No	Putative Alternative splicing transcript
CPATCC_0029410	No	Assembly complex region (within or in other species)
CPATCC_0029520	No	Assembly complex region (within or in other species)
CPATCC_0030400	No	Putative split gene in other species
CPATCC_0031050	No	Assembly complex region (within or in other species)
CPATCC_0031240	No	Assembly complex region (within or in other species)
CPATCC_0032630	No	Putative split gene in other species
CPATCC_0033260	No	Putative split gene in other species
CPATCC_0033730	No	Assembly complex region (within or in other species)
CPATCC_0034170	No	Putative split gene in other species
CPATCC_0035590	No	Putative Alternative splicing transcript
CPATCC_0035720	No	Assembly complex region (within or in other species)
CPATCC_0036360	No	Assembly complex region (within or in other species)
CPATCC_0036430	No	Assembly complex region (within or in other species)
CPATCC_0039490	No	Assembly complex region (within or in other species)
CPATCC_0039520	No	Assembly complex region (within or in other species)
CPATCC_0039530	No	Assembly complex region (within or in other species)
CPATCC_0039540	No	Assembly complex region (within or in other species)
CPATCC_0039550	No	Assembly complex region (within or in other species)
CPATCC_0024650	No	Ortholog found in the other species
CPATCC_0013620	No	Ortholog found in the other species
CPATCC_0000730	No	Ortholog found in the other species
GY17_00000575	No	Ortholog found in the other species
GY17_00000588	No	Assembly complex region (within or in other species)
GY17_00000626	No	Putative Alternative splicing transcript
GY17_00000755	No	Assembly complex region (within or in other species)
GY17_00000798	No	Assembly complex region (within or in other species)
GY17_00000869	No	Assembly complex region (within or in other species)
GY17_00000937	No	Ortholog found in the other species
GY17_00001917	No	Assembly complex region (within or in other species)
GY17_00002051	No	Assembly complex region (within or in other species)
GY17_00002058	No	Putative split gene
GY17_00002281	No	Putative split gene
GY17_00002290	No	Assembly complex region (within or in other species)
GY17_00002440	No	Putative split gene
GY17_00000001	No	Ortholog found in the other species
GY17_00000403	No	Assembly complex region (within or in other species)
GY17_00000412	No	Putative split gene
GY17_00000435	yes	Putative unique gene
GY17_00000491	No	Putative split gene
GY17_00000495	No	Assembly complex region (within or in other species)
GY17_00000499	No	Assembly complex region (within or in other species)
GY17_00002912	No	Ortholog found in the other species
GY17_00003989	No	Putative split gene
GY17_00003873	No	Putative split gene
GY17_00003894	No	Putative split gene
GY17_00001451	No	Ortholog found in the other species
GY17_00001562	No	Assembly complex region (within or in other species)
GY17_00001589	No	Assembly complex region (within or in other species)
GY17_00001645	No	Ortholog found in the other species
GY17_00003978	No	Assembly complex region (within or in other species)
GY17_00003973	No	Assembly complex region (within or in other species)
GY17_00003974	No	Assembly complex region (within or in other species)
GY17_00003969	No	Not enough information to support
GY17_00003195	No	Ortholog found in the other species
GY17_00003381	No	Assembly complex region (within or in other species)
GY17_00003862	No	Assembly complex region (within or in other species)
GY17_00003938	No	Putative split gene
GY17_00003954	No	Ortholog found in the other species
GY17_00002280	No	Putative split gene
GY17_00003981	No	Assembly complex region (within or in other species)
GY17_00003498	No	Putative split gene
GY17_00001044	No	Putative split gene
GY17_00001075	No	Putative Alternative splicing transcript
GY17_00001093	No	Ortholog found in the other species
GY17_00001102	No	Assembly complex region (within or in other species)
GY17_00001238	No	Ortholog found in the other species
GY17_00001303	No	Assembly complex region (within or in other species)
GY17_00003987	No	Assembly complex region (within or in other species)
GY17_00003991	No	Assembly complex region (within or in other species)
GY17_00003995	No	Assembly complex region (within or in other species)
GY17_00003983	No	Assembly complex region (within or in other species)
GY17_00003982	No	Assembly complex region (within or in other species)
GY17_00003984	No	Assembly complex region (within or in other species)
GY17_00003993	No	Assembly complex region (within or in other species)
GY17_00003996	No	Assembly complex region (within or in other species)
GY17_00003990	No	Assembly complex region (within or in other species)
GY17_00001439	No	Putative split gene
GY17_00003166	No	Putative split gene
GY17_00002441	No	Assembly complex region (within or in other species)
CTYZ_00003595	No	Putative split gene
CTYZ_00003804	No	Putative Alternative splicing transcript
CTYZ_00003835	No	Putative split gene
CTYZ_00003911	No	Putative split gene
CTYZ_00003923	No	Putative split gene
CTYZ_00003926	No	Putative split gene
CTYZ_00003937	No	Assembly complex region (within or in other species)
CTYZ_00002307	No	Putative split gene
CTYZ_00002419	No	Putative split gene
CTYZ_00002428	No	Putative split gene
CTYZ_00002495	No	Putative split gene
CTYZ_00002516	No	Putative split gene
CTYZ_00002527	No	Putative split gene
CTYZ_00002698	No	Assembly complex region (within or in other species)
CTYZ_00002699	No	Assembly complex region (within or in other species)
CTYZ_00002700	No	Assembly complex region (within or in other species)
CTYZ_00002701	No	Assembly complex region (within or in other species)
CTYZ_00002702	No	Assembly complex region (within or in other species)
CTYZ_00002743	No	Assembly complex region (within or in other species)
CTYZ_00002772	No	Assembly complex region (within or in other species)
CTYZ_00002856	No	Ortholog found in the other species
CTYZ_00002862	No	Putative split gene
CTYZ_00002898	No	Putative split gene
CTYZ_00003045	No	Putative split gene
CTYZ_00003078	No	Putative split gene
CTYZ_00003162	No	Putative split gene
CTYZ_00001754	No	Assembly complex region (within or in other species)
CTYZ_00001783	No	Putative split gene
CTYZ_00001849	No	Ortholog found in the other species
CTYZ_00001867	No	Putative split gene
CTYZ_00002049	No	Putative split gene
CTYZ_00002137	No	Putative split gene
CTYZ_00002215	No	Assembly complex region (within or in other species)
CTYZ_00002217	No	Assembly complex region (within or in other species)
CTYZ_00002225	No	Ortholog found in the other species
CTYZ_00003167	No	Assembly complex region (within or in other species)
CTYZ_00003195	No	Assembly complex region (within or in other species)
CTYZ_00003215	No	Ortholog found in the other species
CTYZ_00003217	No	Putative split gene
CTYZ_00003260	No	Ortholog found in the other species
CTYZ_00003386	No	Putative split gene
CTYZ_00003390	No	Putative split gene
CTYZ_00003486	No	Assembly complex region (within or in other species)
CTYZ_00003497	No	Putative split gene
CTYZ_00003555	No	Putative split gene
CTYZ_00003578	No	Assembly complex region (within or in other species)
CTYZ_00003579	No	Assembly complex region (within or in other species)
CTYZ_00001190	No	Putative split gene
CTYZ_00001202	No	Putative split gene
CTYZ_00001298	No	Putative split gene
CTYZ_00001413	No	Putative split gene
CTYZ_00001430	No	Assembly complex region (within or in other species)
CTYZ_00001450	No	Assembly complex region (within or in other species)
CTYZ_00001466	No	Putative split gene
CTYZ_00001509	No	Putative split gene
CTYZ_00001533	No	Putative split gene
CTYZ_00001605	No	Putative split gene
CTYZ_00001611	No	Ortholog found in the other species
CTYZ_00001619	No	Putative split gene
CTYZ_00001677	No	Assembly complex region (within or in other species)
CTYZ_00000619	No	Putative split gene
CTYZ_00000634	No	Putative split gene
CTYZ_00000764	No	Putative split gene
CTYZ_00000833	No	Putative split gene
CTYZ_00000994	No	Putative split gene
CTYZ_00001042	No	Putative split gene
CTYZ_00000003	No	Putative split gene
CTYZ_00000036	No	Putative split gene
CTYZ_00000072	No	Putative split gene
CTYZ_00000074	No	Putative split gene
CTYZ_00000077	No	Assembly complex region (within or in other species)
CTYZ_00000078	No	Assembly complex region (within or in other species)
CTYZ_00000082	No	Putative split gene
CTYZ_00000111	No	Assembly complex region (within or in other species)
CTYZ_00000143	No	Putative split gene
CTYZ_00000160	No	Assembly complex region (within or in other species)
CTYZ_00000172	No	Assembly complex region (within or in other species)
CTYZ_00000208	yes	Putative unique in UGA55 (hit with C.velia)
CTYZ_00000213	No	Assembly complex region (within or in other species)
CTYZ_00000217	No	Putative split gene
CTYZ_00000272	No	Putative split gene
CTYZ_00000315	No	Putative split gene
CTYZ_00000328	No	Putative split gene
CTYZ_00000360	No	Putative split gene
CTYZ_00000388	No	Ortholog found in the other species
CTYZ_00000390	No	Putative split gene
CTYZ_00000457	No	Putative split gene
CTYZ_00000462	No	Putative split gene
CTYZ_00000555	No	Assembly complex region (within or in other species)
CTYZ_00000587	No	Assembly complex region (within or in other species)
CTYZ_00003985-2	No	Assembly complex region (within or in other species)
CTYZ_00003987	No	Assembly complex region (within or in other species)
CTYZ_00003989	No	Assembly complex region (within or in other species)
CTYZ_00004006	No	Ortholog found in the other species
CTYZ_00002609	No	Ortholog found in the other species
CTYZ_00002704	No	Ortholog found in the other species
CTYZ_00002780	No	Putative split gene
CTYZ_00001779	No	Putative split gene
CTYZ_00003374	No	Putative split gene
CTYZ_00001262	No	Putative split gene
CTYZ_00001356	No	Putative split gene
CTYZ_00000633	No	Putative split gene
CTYZ_00000694	No	Putative split gene
CTYZ_00000076	No	Assembly complex region (within or in other species)
Shared Between species
CPATCC_0004810		Putative missing in C. tyzzery
CPATCC_0022060		Putative missing in C. tyzzery
*Assembly complex region (within or in other species) represents gene annotations found by alignment in gap, repetitive or fragment boundaries regions

## Sheet: TABLE S8
Table S8 - Repeat Masker Results for CpIA
Chromosome	Start	End	Repeat_class
CP044422	6	772	Simple_repeat
CP044422	1136	1176	Simple_repeat
CP044422	3138	3177	Simple_repeat
CP044422	3221	3253	Simple_repeat
CP044422	3984	4009	Simple_repeat
CP044422	4319	4357	Simple_repeat
CP044422	5384	5483	Simple_repeat
CP044422	5475	5509	Simple_repeat
CP044422	5513	5541	Simple_repeat
CP044422	5838	5961	Simple_repeat
CP044422	6239	6340	Simple_repeat
CP044422	6292	6346	Simple_repeat
CP044422	7688	7734	Simple_repeat
CP044422	8093	8148	Simple_repeat
CP044422	9261	9319	Simple_repeat
CP044422	9588	9635	Simple_repeat
CP044422	9599	9622	Simple_repeat
CP044422	9676	9716	Simple_repeat
CP044422	9963	10028	Simple_repeat
CP044422	13411	13448	Simple_repeat
CP044422	14253	14286	Simple_repeat
CP044422	14362	14406	Simple_repeat
CP044422	26388	26444	Simple_repeat
CP044422	26392	26422	Simple_repeat
CP044422	29752	29805	Simple_repeat
CP044422	30298	30337	Simple_repeat
CP044422	31099	31130	Simple_repeat
CP044422	31479	31590	Simple_repeat
CP044422	34843	34866	Simple_repeat
CP044422	35322	35362	Simple_repeat
CP044422	48912	48969	Simple_repeat
CP044422	50740	50770	Simple_repeat
CP044422	51223	51276	Simple_repeat
CP044422	51788	51853	Simple_repeat
CP044422	52905	53046	Simple_repeat
CP044422	53277	53358	Simple_repeat
CP044422	54138	54178	Simple_repeat
CP044422	54358	54427	Simple_repeat
CP044422	54498	54554	Simple_repeat
CP044422	54563	54601	Simple_repeat
CP044422	55284	55314	Simple_repeat
CP044422	56314	56379	Simple_repeat
CP044422	60625	60659	Simple_repeat
CP044422	62733	62785	Simple_repeat
CP044422	62742	62784	Simple_repeat
CP044422	64283	64323	Simple_repeat
CP044422	64287	64377	Simple_repeat
CP044422	64559	64598	Simple_repeat
CP044422	68832	68902	Simple_repeat
CP044422	69122	69160	Simple_repeat
CP044422	69234	69293	Simple_repeat
CP044422	69237	69269	Simple_repeat
CP044422	69239	69268	Simple_repeat
CP044422	70429	70477	Simple_repeat
CP044422	70721	70763	Simple_repeat
CP044422	71329	71403	Simple_repeat
CP044422	71469	71499	Simple_repeat
CP044422	73232	73272	Simple_repeat
CP044422	73233	73255	Simple_repeat
CP044422	74447	74478	Simple_repeat
CP044422	75592	75633	Simple_repeat
CP044422	80617	80667	Simple_repeat
CP044422	81292	81399	Simple_repeat
CP044422	81475	81505	Simple_repeat
CP044422	81610	81641	Simple_repeat
CP044422	81676	81726	Simple_repeat
CP044422	81922	81951	Simple_repeat
CP044422	82138	82169	Simple_repeat
CP044422	82225	82260	Simple_repeat
CP044422	82279	82323	Simple_repeat
CP044422	83132	83160	Simple_repeat
CP044422	83194	83238	Simple_repeat
CP044422	83354	83379	Simple_repeat
CP044422	83555	83595	Simple_repeat
CP044422	83560	83585	Simple_repeat
CP044422	84895	84919	Simple_repeat
CP044422	85336	85370	Simple_repeat
CP044422	86029	86062	Simple_repeat
CP044422	86510	86619	Simple_repeat
CP044422	86636	86704	Unspecified
CP044422	86648	86715	Unspecified
CP044422	87222	87250	Simple_repeat
CP044422	88586	88608	Simple_repeat
CP044422	89166	89194	Simple_repeat
CP044422	90871	90913	Simple_repeat
CP044422	91844	91874	Simple_repeat
CP044422	92014	92051	Simple_repeat
CP044422	97225	97264	Simple_repeat
CP044422	99189	99236	Simple_repeat
CP044422	101546	101605	Simple_repeat
CP044422	102323	102353	Simple_repeat
CP044422	102360	102408	Simple_repeat
CP044422	102980	103054	Simple_repeat
CP044422	103492	103534	Simple_repeat
CP044422	106406	106438	Simple_repeat
CP044422	108364	108413	Simple_repeat
CP044422	108654	108696	Simple_repeat
CP044422	108789	108818	Simple_repeat
CP044422	109047	109068	Simple_repeat
CP044422	110549	110612	Simple_repeat
CP044422	111963	112025	Unspecified
CP044422	112861	112879	Simple_repeat
CP044422	113100	113121	Simple_repeat
CP044422	113177	113200	Simple_repeat
CP044422	113528	113574	Simple_repeat
CP044422	114558	114601	Simple_repeat
CP044422	115226	115286	Simple_repeat
CP044422	115244	115265	Simple_repeat
CP044422	115289	115335	Simple_repeat
CP044422	115355	115390	Simple_repeat
CP044422	115449	115516	Unspecified
CP044422	115457	115525	Unspecified
CP044422	115466	115534	Unspecified
CP044422	115478	115546	Unspecified
CP044422	115502	115569	Unspecified
CP044422	115520	115587	Unspecified
CP044422	115529	115595	Unspecified
CP044422	115596	115662	Simple_repeat
CP044422	115619	115685	Simple_repeat
CP044422	115874	115897	Simple_repeat
CP044422	116614	116671	Simple_repeat
CP044422	118563	118604	Simple_repeat
CP044422	119305	119344	Simple_repeat
CP044422	120145	120179	Simple_repeat
CP044422	120712	120772	Simple_repeat
CP044422	121774	121822	Simple_repeat
CP044422	122962	123017	Simple_repeat
CP044422	123430	123459	Simple_repeat
CP044422	123685	123715	Simple_repeat
CP044422	123757	123781	Simple_repeat
CP044422	123927	123945	Simple_repeat
CP044422	124300	124415	Simple_repeat
CP044422	124528	124583	Simple_repeat
CP044422	124839	124896	Simple_repeat
CP044422	125710	125745	Simple_repeat
CP044422	126331	126360	Simple_repeat
CP044422	126739	126879	Simple_repeat
CP044422	126798	126839	Simple_repeat
CP044422	127417	127497	Simple_repeat
CP044422	128049	128121	Simple_repeat
CP044422	128053	128193	Simple_repeat
CP044422	128299	128351	Simple_repeat
CP044422	128839	128908	Simple_repeat
CP044422	131718	131761	Simple_repeat
CP044422	132874	132950	Simple_repeat
CP044422	136211	136296	Simple_repeat
CP044422	137333	137370	Simple_repeat
CP044422	137377	137430	Simple_repeat
CP044422	137436	137473	Simple_repeat
CP044422	137885	137932	Simple_repeat
CP044422	138635	138670	Simple_repeat
CP044422	139968	139986	Simple_repeat
CP044422	139983	140028	Simple_repeat
CP044422	140263	140329	Simple_repeat
CP044422	140556	140600	Simple_repeat
CP044422	140562	140598	Simple_repeat
CP044422	141231	141324	Simple_repeat
CP044422	141338	141394	Simple_repeat
CP044422	141415	141462	Simple_repeat
CP044422	141744	141780	Simple_repeat
CP044422	142625	142668	Simple_repeat
CP044422	142643	142733	Simple_repeat
CP044422	142820	142879	Unspecified
CP044422	142827	142879	Unspecified
CP044422	143100	143190	Simple_repeat
CP044422	143161	143365	Simple_repeat
CP044422	145270	145295	Simple_repeat
CP044422	145611	145649	Simple_repeat
CP044422	145620	145680	Simple_repeat
CP044422	146367	146403	Simple_repeat
CP044422	146713	146756	Simple_repeat
CP044422	147204	147243	Simple_repeat
CP044422	147312	147348	Simple_repeat
CP044422	149555	149606	Simple_repeat
CP044422	149621	149677	Simple_repeat
CP044422	150225	150277	Simple_repeat
CP044422	150472	150526	Simple_repeat
CP044422	155479	155510	Simple_repeat
CP044422	155672	155717	Simple_repeat
CP044422	155676	155716	Simple_repeat
CP044422	156024	156081	Simple_repeat
CP044422	156902	156957	Simple_repeat
CP044422	157446	157472	Simple_repeat
CP044422	157497	157558	Simple_repeat
CP044422	158029	158046	Simple_repeat
CP044422	158415	158477	Simple_repeat
CP044422	158929	159003	Simple_repeat
CP044422	159129	159169	Simple_repeat
CP044422	160499	160525	Simple_repeat
CP044422	160584	160617	Simple_repeat
CP044422	160911	160975	Simple_repeat
CP044422	161081	161110	Simple_repeat
CP044422	161409	161486	Simple_repeat
CP044422	161571	161624	Simple_repeat
CP044422	163327	163367	Simple_repeat
CP044422	163466	163503	Simple_repeat
CP044422	163618	163656	Simple_repeat
CP044422	164041	164070	Simple_repeat
CP044422	164125	164159	Simple_repeat
CP044422	164377	164419	Simple_repeat
CP044422	164444	164508	Simple_repeat
CP044422	166278	166379	Simple_repeat
CP044422	167138	167176	Simple_repeat
CP044422	168365	168404	Simple_repeat
CP044422	168978	169003	Simple_repeat
CP044422	170327	170369	Simple_repeat
CP044422	170384	170413	Simple_repeat
CP044422	170735	170751	Simple_repeat
CP044422	171541	171571	Simple_repeat
CP044422	172303	172332	Simple_repeat
CP044422	175376	175407	Simple_repeat
CP044422	175462	175512	Simple_repeat
CP044422	176874	176916	Simple_repeat
CP044422	177228	177287	Simple_repeat
CP044422	179072	179147	Simple_repeat
CP044422	181125	181173	Simple_repeat
CP044422	181355	181445	Simple_repeat
CP044422	181597	181648	Simple_repeat
CP044422	181751	181797	Simple_repeat
CP044422	181827	181853	Simple_repeat
CP044422	181854	181947	Simple_repeat
CP044422	181948	182100	Simple_repeat
CP044422	182275	182313	Simple_repeat
CP044422	182498	182596	Simple_repeat
CP044422	182596	182662	Simple_repeat
CP044422	182732	182802	Simple_repeat
CP044422	183005	183072	Unspecified
CP044422	183019	183090	Unspecified
CP044422	183779	183833	Simple_repeat
CP044422	183911	183957	Simple_repeat
CP044422	183958	184023	Unspecified
CP044422	184200	184222	Simple_repeat
CP044422	184535	184574	Simple_repeat
CP044422	185528	185740	Simple_repeat
CP044422	188047	188094	Simple_repeat
CP044422	189641	189677	Simple_repeat
CP044422	193338	193439	Simple_repeat
CP044422	195977	196015	Simple_repeat
CP044422	201109	201169	Simple_repeat
CP044422	202250	202284	Simple_repeat
CP044422	202788	202833	Simple_repeat
CP044422	202789	202848	Simple_repeat
CP044422	204972	205002	Simple_repeat
CP044422	205663	205692	Simple_repeat
CP044422	208162	208284	Simple_repeat
CP044422	209636	209691	Simple_repeat
CP044422	209638	209686	Simple_repeat
CP044422	210932	210987	Simple_repeat
CP044422	215359	215392	Simple_repeat
CP044422	215364	215413	Simple_repeat
CP044422	216598	216646	Simple_repeat
CP044422	217149	217187	Simple_repeat
CP044422	221317	221409	Simple_repeat
CP044422	224641	224690	Simple_repeat
CP044422	228750	228793	Simple_repeat
CP044422	229209	229225	Simple_repeat
CP044422	230516	230561	Simple_repeat
CP044422	232237	232278	Simple_repeat
CP044422	232391	232417	Simple_repeat
CP044422	239801	239836	Simple_repeat
CP044422	242469	242547	Simple_repeat
CP044422	242497	242553	Simple_repeat
CP044422	242515	242571	Simple_repeat
CP044422	251504	251545	Simple_repeat
CP044422	259825	259865	Simple_repeat
CP044422	260942	260990	Simple_repeat
CP044422	264652	264700	Simple_repeat
CP044422	273899	273936	Simple_repeat
CP044422	282760	282785	Simple_repeat
CP044422	284832	284877	Simple_repeat
CP044422	306727	306771	Simple_repeat
CP044422	307979	308040	Simple_repeat
CP044422	311608	311647	Simple_repeat
CP044422	314447	314466	Simple_repeat
CP044422	315781	315821	Simple_repeat
CP044422	317700	317724	Simple_repeat
CP044422	324035	324068	Simple_repeat
CP044422	324035	324059	Simple_repeat
CP044422	336956	337035	Simple_repeat
CP044422	346140	346225	Simple_repeat
CP044422	355573	355598	Simple_repeat
CP044422	368101	368146	Simple_repeat
CP044422	387075	387122	Simple_repeat
CP044422	397823	397846	Simple_repeat
CP044422	399249	399293	Simple_repeat
CP044422	414507	414545	Simple_repeat
CP044422	418656	418695	Simple_repeat
CP044422	431200	431260	Simple_repeat
CP044422	433350	433402	Simple_repeat
CP044422	441116	441162	Simple_repeat
CP044422	441266	441290	Simple_repeat
CP044422	443817	443836	Simple_repeat
CP044422	448433	448466	Simple_repeat
CP044422	452893	452926	Simple_repeat
CP044422	453340	453382	Simple_repeat
CP044422	455113	455139	Simple_repeat
CP044422	458223	458257	Simple_repeat
CP044422	460400	460423	Simple_repeat
CP044422	476587	476643	Simple_repeat
CP044422	484253	484301	Simple_repeat
CP044422	484255	484296	Simple_repeat
CP044422	487447	487515	Simple_repeat
CP044422	492551	492598	Simple_repeat
CP044422	496102	496123	Simple_repeat
CP044422	501174	501221	Simple_repeat
CP044422	503043	503110	Unspecified
CP044422	511838	511885	Simple_repeat
CP044422	511965	511997	Simple_repeat
CP044422	513742	513801	Simple_repeat
CP044422	513804	513872	Unspecified
CP044422	513819	513887	Unspecified
CP044422	513830	513896	Unspecified
CP044422	513852	513920	Unspecified
CP044422	513864	513932	Unspecified
CP044422	513873	513941	Unspecified
CP044422	513882	513950	Unspecified
CP044422	513893	513959	Unspecified
CP044422	514296	514332	Simple_repeat
CP044422	515956	515995	Simple_repeat
CP044422	516912	516972	Simple_repeat
CP044422	520158	520199	Simple_repeat
CP044422	522412	522447	Simple_repeat
CP044422	543942	543989	Unspecified
CP044422	546783	546824	Simple_repeat
CP044422	548238	548288	Simple_repeat
CP044422	552357	552405	Simple_repeat
CP044422	556163	556222	Simple_repeat
CP044422	557415	557466	Simple_repeat
CP044422	558546	558572	Simple_repeat
CP044422	574981	575017	Simple_repeat
CP044422	584022	584057	Simple_repeat
CP044422	584355	584393	Simple_repeat
CP044422	584361	584392	Simple_repeat
CP044422	590674	590723	Simple_repeat
CP044422	590675	590714	Simple_repeat
CP044422	593012	593036	Simple_repeat
CP044422	598179	598198	Simple_repeat
CP044422	598825	598883	Simple_repeat
CP044422	598832	598885	Simple_repeat
CP044422	604116	604139	Simple_repeat
CP044422	608368	608411	Simple_repeat
CP044422	614751	614799	Simple_repeat
CP044422	615463	615502	Simple_repeat
CP044422	616707	616778	Simple_repeat
CP044422	617790	617851	Simple_repeat
CP044422	618989	619088	Simple_repeat
CP044422	619062	619123	Simple_repeat
CP044422	619473	619512	Simple_repeat
CP044422	619672	619697	Simple_repeat
CP044422	619992	620011	Simple_repeat
CP044422	627602	627618	Simple_repeat
CP044422	627921	627958	Simple_repeat
CP044422	627960	627998	Simple_repeat
CP044422	628711	628753	Simple_repeat
CP044422	629181	629265	Simple_repeat
CP044422	629725	629766	Simple_repeat
CP044422	631284	631316	Simple_repeat
CP044422	631440	631474	Simple_repeat
CP044422	632962	632997	Simple_repeat
CP044422	632962	632992	Simple_repeat
CP044422	636940	636971	Simple_repeat
CP044422	636972	637016	Simple_repeat
CP044422	642585	642612	Simple_repeat
CP044422	643846	643874	Simple_repeat
CP044422	649111	649138	Simple_repeat
CP044422	650965	650994	Simple_repeat
CP044422	653790	653847	Simple_repeat
CP044422	654325	654356	Simple_repeat
CP044422	654758	654791	Simple_repeat
CP044422	654759	654790	Simple_repeat
CP044422	655069	655105	Simple_repeat
CP044422	656275	656320	Simple_repeat
CP044422	663017	663080	Simple_repeat
CP044422	666907	666933	Simple_repeat
CP044422	667198	667242	Simple_repeat
CP044422	667667	667732	Simple_repeat
CP044422	669859	669880	Simple_repeat
CP044422	672242	672279	Simple_repeat
CP044422	673915	673939	Simple_repeat
CP044422	674096	674114	Simple_repeat
CP044422	674372	674405	Simple_repeat
CP044422	678934	679019	Simple_repeat
CP044422	679387	679415	Simple_repeat
CP044422	682078	682108	Simple_repeat
CP044422	684470	684500	Simple_repeat
CP044422	687748	687773	Simple_repeat
CP044422	692341	692379	Simple_repeat
CP044422	695592	695621	Simple_repeat
CP044422	695800	695874	Simple_repeat
CP044422	696128	696156	Simple_repeat
CP044422	698398	698429	Simple_repeat
CP044422	700449	700478	Simple_repeat
CP044422	703449	703499	Simple_repeat
CP044422	704535	704592	Simple_repeat
CP044422	704591	704611	Simple_repeat
CP044422	705473	705494	Simple_repeat
CP044422	705954	706012	Simple_repeat
CP044422	706550	706586	Simple_repeat
CP044422	706633	706685	Simple_repeat
CP044422	706794	706819	Simple_repeat
CP044422	708096	708175	Simple_repeat
CP044422	708944	709003	Simple_repeat
CP044422	708980	709036	Simple_repeat
CP044422	710754	710831	Simple_repeat
CP044422	712621	712655	Simple_repeat
CP044422	712987	713020	Simple_repeat
CP044422	714634	714682	Simple_repeat
CP044422	717255	717273	Simple_repeat
CP044422	717448	717525	Simple_repeat
CP044422	718721	718752	Simple_repeat
CP044422	724235	724266	Simple_repeat
CP044422	726972	727020	Simple_repeat
CP044422	730125	730167	Simple_repeat
CP044422	731377	731455	Simple_repeat
CP044422	733781	733817	Simple_repeat
CP044422	741482	741515	Simple_repeat
CP044422	742984	743050	Simple_repeat
CP044422	742986	743056	Simple_repeat
CP044422	743319	743369	Simple_repeat
CP044422	743742	743829	Simple_repeat
CP044422	744141	744181	Simple_repeat
CP044422	747652	747684	Simple_repeat
CP044422	748004	748042	Simple_repeat
CP044422	749706	749750	Simple_repeat
CP044422	750654	750703	Simple_repeat
CP044422	751492	751532	Simple_repeat
CP044422	751996	752032	Simple_repeat
CP044422	752043	752101	Simple_repeat
CP044422	753819	753868	Simple_repeat
CP044422	756658	756695	Simple_repeat
CP044422	757445	757479	Simple_repeat
CP044422	757849	757889	Simple_repeat
CP044422	760469	760486	Simple_repeat
CP044422	761217	761247	Simple_repeat
CP044422	761584	761621	Simple_repeat
CP044422	762800	762855	Simple_repeat
CP044422	762960	762998	Simple_repeat
CP044422	763654	763743	Simple_repeat
CP044422	767188	767253	Simple_repeat
CP044422	767280	767319	Simple_repeat
CP044422	769640	769683	Simple_repeat
CP044422	770955	770988	Simple_repeat
CP044422	771805	771824	Simple_repeat
CP044422	772639	772681	Simple_repeat
CP044422	773497	773518	Simple_repeat
CP044422	773897	773945	Simple_repeat
CP044422	774197	774246	Simple_repeat
CP044422	775288	775366	Simple_repeat
CP044422	776997	777032	Simple_repeat
CP044422	777704	777741	Simple_repeat
CP044422	778080	778142	Simple_repeat
CP044422	778279	778303	Simple_repeat
CP044422	778483	778531	Simple_repeat
CP044422	779364	779407	Simple_repeat
CP044422	779992	780045	Simple_repeat
CP044422	781199	781274	Simple_repeat
CP044422	782351	782396	Simple_repeat
CP044422	783814	783863	Simple_repeat
CP044422	788157	788190	Simple_repeat
CP044422	788159	788199	Simple_repeat
CP044422	794675	794704	Simple_repeat
CP044422	795296	795342	Simple_repeat
CP044422	795321	795398	Simple_repeat
CP044422	795977	796031	Simple_repeat
CP044422	796156	796204	Simple_repeat
CP044422	796230	796252	Simple_repeat
CP044422	798892	798926	Simple_repeat
CP044422	800988	801046	Simple_repeat
CP044422	804198	804245	Simple_repeat
CP044422	806187	806213	Simple_repeat
CP044422	812344	812380	Simple_repeat
CP044422	813382	813426	Simple_repeat
CP044422	819870	819926	Simple_repeat
CP044422	821215	821254	Simple_repeat
CP044422	821813	821846	Simple_repeat
CP044422	823915	823941	Simple_repeat
CP044422	823973	824024	Simple_repeat
CP044422	825357	825400	Simple_repeat
CP044422	826990	827030	Simple_repeat
CP044422	828736	828796	Simple_repeat
CP044422	829085	829128	Simple_repeat
CP044422	829476	829505	Simple_repeat
CP044422	830326	830371	Simple_repeat
CP044422	832085	832113	Simple_repeat
CP044422	834567	834603	Simple_repeat
CP044422	837721	837761	Simple_repeat
CP044422	838795	838842	Simple_repeat
CP044422	838945	839012	Simple_repeat
CP044422	839818	839858	Simple_repeat
CP044422	841288	841429	Simple_repeat
CP044422	841933	842018	Simple_repeat
CP044422	842911	842950	Simple_repeat
CP044422	846014	846081	Simple_repeat
CP044422	847821	847852	Simple_repeat
CP044422	850153	850209	Simple_repeat
CP044422	858901	858954	Simple_repeat
CP044422	864450	864481	Simple_repeat
CP044422	873207	873247	Simple_repeat
CP044422	874188	874230	Simple_repeat
CP044422	874849	874882	Simple_repeat
CP044422	874850	874909	Simple_repeat
CP044422	874856	874909	Simple_repeat
CP044422	875327	875391	Simple_repeat
CP044422	875470	875500	Simple_repeat
CP044422	875742	875828	Simple_repeat
CP044422	877627	877661	Simple_repeat
CP044422	877746	877778	Simple_repeat
CP044422	877784	877823	Simple_repeat
CP044422	877969	878037	Simple_repeat
CP044422	877976	878033	Simple_repeat
CP044422	878039	878082	Simple_repeat
CP044422	878305	878339	Simple_repeat
CP044422	878497	878532	Simple_repeat
CP044422	878662	878703	Simple_repeat
CP044422	879437	879458	Simple_repeat
CP044422	879937	879977	Simple_repeat
CP044422	882298	882332	Simple_repeat
CP044422	882300	882332	Simple_repeat
CP044422	882300	882330	Simple_repeat
CP044422	882339	882395	Simple_repeat
CP044422	882402	882505	Simple_repeat
CP044422	883149	883194	Simple_repeat
CP044422	883248	883297	Simple_repeat
CP044422	883620	883678	Simple_repeat
CP044422	884963	884992	Simple_repeat
CP044422	885483	885502	Simple_repeat
CP044422	885629	885674	Simple_repeat
CP044422	885697	885966	Simple_repeat
CP044422	885738	885767	Simple_repeat
CP044422	886130	886191	Simple_repeat
CP044422	886219	886254	Simple_repeat
CP044422	886234	886257	Simple_repeat
CP044422	887132	887169	Simple_repeat
CP044422	887324	887367	Simple_repeat
CP044422	887540	887556	Simple_repeat
CP044422	887765	887797	Simple_repeat
CP044422	888500	888568	Unspecified
CP044422	888509	888577	Unspecified
CP044422	888518	888586	Unspecified
CP044422	888528	888595	Unspecified
CP044422	888536	888604	Unspecified
CP044422	888545	888613	Unspecified
CP044422	889277	889343	Simple_repeat
CP044422	890828	890877	Simple_repeat
CP044422	891161	891215	Simple_repeat
CP044422	891221	891250	Simple_repeat
CP044422	891559	891605	Simple_repeat
CP044422	891731	891827	Simple_repeat
CP044422	891850	891870	Simple_repeat
CP044422	892169	892221	Simple_repeat
CP044422	892298	892326	Simple_repeat
CP044422	892409	892700	Simple_repeat
CP044422	892734	893058	Simple_repeat
CP044422	893064	893131	Unspecified
CP044422	893133	893243	Simple_repeat
CP044422	893527	893554	Simple_repeat
CP044422	893869	893907	Simple_repeat
CP044422	893908	893940	Simple_repeat
CP044422	893941	893967	Simple_repeat
CP044422	894646	894712	Simple_repeat
CP044422	895146	895260	Simple_repeat
CP044422	895618	895658	Simple_repeat
CP044422	895664	895691	Simple_repeat
CP044422	895803	895826	Simple_repeat
CP044422	895915	896030	Simple_repeat
CP044422	896783	896822	Simple_repeat
CP044422	897726	897746	Simple_repeat
CP044422	897804	897830	Simple_repeat
CP044422	897866	897922	Simple_repeat
CP044422	897896	897917	Simple_repeat
CP044422	898103	898140	Simple_repeat
CP044422	898175	898216	Simple_repeat
CP044422	898767	898798	Simple_repeat
CP044422	898846	898885	Simple_repeat
CP044422	899028	899098	Simple_repeat
CP044422	899306	899334	Simple_repeat
CP044422	899393	899442	Simple_repeat
CP044422	899418	899442	Simple_repeat
CP044422	900387	900438	Simple_repeat
CP044422	901358	901395	Simple_repeat
CP044422	901439	901524	Simple_repeat
CP044422	901604	901637	Simple_repeat
CP044422	902923	902950	Simple_repeat
CP044422	903402	903425	Simple_repeat
CP044422	903673	903709	Simple_repeat
CP044422	903710	903742	Simple_repeat
CP044422	903743	903755	Simple_repeat
CP044422	903864	903925	Simple_repeat
CP044422	904236	904278	Simple_repeat
CP044422	904294	904343	Simple_repeat
CP044422	904539	904662	Simple_repeat
CP044422	904896	904935	Simple_repeat
CP044422	905007	905088	Simple_repeat
CP044422	905007	905085	Simple_repeat
CP044422	905137	905184	Simple_repeat
CP044422	905185	905389	Simple_repeat
CP044422	905390	905433	Simple_repeat
CP044422	905707	905736	Simple_repeat
CP044422	905805	905859	Simple_repeat
CP044422	906331	906360	Simple_repeat
CP044422	906735	906751	Simple_repeat
CP044422	906812	906839	Simple_repeat
CP044422	906943	906967	Simple_repeat
CP044422	907037	907064	Simple_repeat
CP044422	907081	907144	Unspecified
CP044422	907304	907413	Simple_repeat
CP044422	907305	907340	Simple_repeat
CP044422	907448	907530	Simple_repeat
CP044422	907549	907654	Simple_repeat
CP044422	907689	907720	Simple_repeat
CP044422	907990	908011	Simple_repeat
CP044422	908204	908221	Simple_repeat
CP044422	908431	908484	Simple_repeat
CP044422	908570	908602	Simple_repeat
CP044422	908639	908661	Simple_repeat
CP044422	908827	908897	Simple_repeat
CP044422	909053	909076	Simple_repeat
CP044422	909109	909161	Simple_repeat
CP044422	909428	909519	Simple_repeat
CP044422	909429	909508	Simple_repeat
CP044422	909688	909730	Simple_repeat
CP044422	909706	909726	Simple_repeat
CP044422	909744	909848	Simple_repeat
CP044422	909967	909999	Simple_repeat
CP044422	910118	910139	Simple_repeat
CP044422	910301	910338	Simple_repeat
CP044422	910449	910471	Simple_repeat
CP044422	910660	910723	Simple_repeat
CP044422	910698	910746	Simple_repeat
CP044422	910948	910975	Simple_repeat
CP044422	911184	911250	Unspecified
CP044422	911335	911356	Simple_repeat
CP044422	911731	911764	Simple_repeat
CP044422	912090	912118	Simple_repeat
CP044422	912114	912238	Simple_repeat
CP044422	912306	912324	Simple_repeat
CP044422	912411	912503	Simple_repeat
CP044422	912505	912529	Simple_repeat
CP044422	912597	912659	Simple_repeat
CP044422	912811	912837	Simple_repeat
CP044422	912881	912992	Simple_repeat
CP044422	913342	913367	Simple_repeat
CP044422	913772	913809	Simple_repeat
CP044422	913876	913910	Simple_repeat
CP044422	914035	914066	Simple_repeat
CP044422	914071	914152	Simple_repeat
CP044422	914236	914260	Simple_repeat
CP044422	914385	914444	Simple_repeat
CP044422	914602	914637	Simple_repeat
CP044422	914749	914774	Simple_repeat
CP044422	914985	915045	Simple_repeat
CP044422	915023	915068	Simple_repeat
CP044422	915185	915222	Simple_repeat
CP044422	915285	915306	Simple_repeat
CP044422	915477	915554	Simple_repeat
CP044422	915499	915611	Simple_repeat
CP044422	915767	915798	Simple_repeat
CP044422	916045	916064	Simple_repeat
CP044422	916312	916347	Simple_repeat
CP044422	916583	916607	Simple_repeat
CP044422	916800	916840	Simple_repeat
CP044422	916857	916921	Simple_repeat
CP044422	916863	916918	Simple_repeat
CP044422	917143	917235	Simple_repeat
CP044422	917379	917411	Simple_repeat
CP044422	917525	917575	Simple_repeat
CP044422	918481	918536	Simple_repeat
CP044422	918586	918602	Simple_repeat
CP044422	918698	918745	Simple_repeat
CP044422	919299	919338	Simple_repeat
CP044422	919390	919415	Simple_repeat
CP044422	919874	920510	Simple_repeat
CP044421	1	769	Simple_repeat
CP044421	1225	1255	Simple_repeat
CP044421	16274	16319	Simple_repeat
CP044421	16429	16494	Simple_repeat
CP044421	18560	18596	Simple_repeat
CP044421	18905	18945	Simple_repeat
CP044421	21642	21675	Simple_repeat
CP044421	22678	22699	Simple_repeat
CP044421	25897	25946	Simple_repeat
CP044421	26493	26528	Simple_repeat
CP044421	45267	45294	Simple_repeat
CP044421	46075	46105	Simple_repeat
CP044421	49724	49748	Simple_repeat
CP044421	50894	50954	Simple_repeat
CP044421	50898	50955	Simple_repeat
CP044421	51361	51399	Simple_repeat
CP044421	51419	51484	Simple_repeat
CP044421	53049	53084	Simple_repeat
CP044421	54556	54602	Simple_repeat
CP044421	57518	57566	Simple_repeat
CP044421	57525	57566	Simple_repeat
CP044421	59253	59276	Simple_repeat
CP044421	59982	60005	Simple_repeat
CP044421	60006	60047	Simple_repeat
CP044421	64919	64950	Simple_repeat
CP044421	65253	65285	Simple_repeat
CP044421	65253	65281	Simple_repeat
CP044421	68949	69000	Simple_repeat
CP044421	70775	70839	Simple_repeat
CP044421	72870	72917	Simple_repeat
CP044421	73220	73266	Simple_repeat
CP044421	73417	73468	Simple_repeat
CP044421	73787	73813	Simple_repeat
CP044421	73920	73963	Simple_repeat
CP044421	76738	76843	Simple_repeat
CP044421	76985	77019	Simple_repeat
CP044421	77025	77058	Simple_repeat
CP044421	77324	77348	Simple_repeat
CP044421	77826	77876	Simple_repeat
CP044421	80145	80174	Simple_repeat
CP044421	80863	80909	Simple_repeat
CP044421	81787	81810	Simple_repeat
CP044421	85598	85648	Simple_repeat
CP044421	85818	85842	Simple_repeat
CP044421	86064	86099	Simple_repeat
CP044421	87563	87612	Simple_repeat
CP044421	91453	91497	Simple_repeat
CP044421	92290	92327	Simple_repeat
CP044421	92437	92493	Simple_repeat
CP044421	92783	92836	Simple_repeat
CP044421	94359	94390	Simple_repeat
CP044421	94755	94784	Simple_repeat
CP044421	95100	95136	Simple_repeat
CP044421	97826	97866	Simple_repeat
CP044421	99089	99126	Simple_repeat
CP044421	100536	100586	Simple_repeat
CP044421	102060	102113	Simple_repeat
CP044421	102503	102524	Simple_repeat
CP044421	102690	102744	Simple_repeat
CP044421	103644	103712	Unspecified
CP044421	103713	103880	Simple_repeat
CP044421	104647	104682	Simple_repeat
CP044421	105728	105802	Unspecified
CP044421	105737	105810	Unspecified
CP044421	105773	105841	Unspecified
CP044421	105784	105851	Unspecified
CP044421	105795	105858	Unspecified
CP044421	107476	107501	Simple_repeat
CP044421	107979	108007	Simple_repeat
CP044421	107986	108041	Simple_repeat
CP044421	108221	108285	Simple_repeat
CP044421	108234	108282	Simple_repeat
CP044421	108598	108650	Simple_repeat
CP044421	108677	108722	Simple_repeat
CP044421	109052	109091	Simple_repeat
CP044421	109908	109949	Simple_repeat
CP044421	109913	109944	Simple_repeat
CP044421	111966	112028	Simple_repeat
CP044421	112348	112415	Unspecified
CP044421	112363	112431	Unspecified
CP044421	112702	112739	Simple_repeat
CP044421	112762	112783	Simple_repeat
CP044421	113099	113217	Simple_repeat
CP044421	113314	113353	Simple_repeat
CP044421	113530	113587	Simple_repeat
CP044421	113680	113708	Simple_repeat
CP044421	113770	113796	Simple_repeat
CP044421	113902	114040	Simple_repeat
CP044421	113904	114024	Simple_repeat
CP044421	115072	115132	Simple_repeat
CP044421	115510	115547	Simple_repeat
CP044421	115766	115804	Simple_repeat
CP044421	116092	116139	Simple_repeat
CP044421	116125	116175	Simple_repeat
CP044421	117020	117083	Simple_repeat
CP044421	117152	117259	Simple_repeat
CP044421	118056	118114	Simple_repeat
CP044421	118117	118153	Simple_repeat
CP044421	118454	118523	Simple_repeat
CP044421	118779	118810	Simple_repeat
CP044421	120337	120395	Simple_repeat
CP044421	123444	123511	Unspecified
CP044421	123883	123914	Simple_repeat
CP044421	124206	124235	Simple_repeat
CP044421	126226	126263	Simple_repeat
CP044421	127119	127156	Simple_repeat
CP044421	129521	129618	Simple_repeat
CP044421	129619	129672	Simple_repeat
CP044421	130443	130468	Simple_repeat
CP044421	130686	130742	Simple_repeat
CP044421	131487	131530	Simple_repeat
CP044421	131805	131861	Simple_repeat
CP044421	132279	132307	Simple_repeat
CP044421	134636	134682	Simple_repeat
CP044421	134887	134919	Simple_repeat
CP044421	136026	136113	Simple_repeat
CP044421	136343	136426	Simple_repeat
CP044421	136990	137026	Simple_repeat
CP044421	137282	137325	Simple_repeat
CP044421	138045	138082	Simple_repeat
CP044421	138791	138871	Simple_repeat
CP044421	139342	139423	Simple_repeat
CP044421	140551	140609	Simple_repeat
CP044421	140689	140726	Simple_repeat
CP044421	140730	140801	Simple_repeat
CP044421	140848	140905	Simple_repeat
CP044421	141485	141554	Simple_repeat
CP044421	141503	141556	Simple_repeat
CP044421	141533	141604	Simple_repeat
CP044421	141964	141990	Simple_repeat
CP044421	142575	142628	Simple_repeat
CP044421	145134	145175	Simple_repeat
CP044421	149479	149503	Simple_repeat
CP044421	154039	154078	Simple_repeat
CP044421	155768	155806	Simple_repeat
CP044421	155769	155805	Simple_repeat
CP044421	158786	158817	Simple_repeat
CP044421	158826	158905	Simple_repeat
CP044421	159682	159717	Simple_repeat
CP044421	160544	160594	Simple_repeat
CP044421	165080	165141	Simple_repeat
CP044421	166357	166390	Simple_repeat
CP044421	175238	175274	Simple_repeat
CP044421	176227	176267	Simple_repeat
CP044421	177922	177975	Simple_repeat
CP044421	178958	178988	Simple_repeat
CP044421	184101	184144	Simple_repeat
CP044421	185878	185896	Simple_repeat
CP044421	186147	186192	Simple_repeat
CP044421	186423	186468	Simple_repeat
CP044421	187921	187958	Simple_repeat
CP044421	196400	196431	Simple_repeat
CP044421	198139	198158	Simple_repeat
CP044421	200087	200128	Simple_repeat
CP044421	201059	201099	Simple_repeat
CP044421	202702	202726	Simple_repeat
CP044421	204641	204750	Simple_repeat
CP044421	205768	205836	Unspecified
CP044421	205780	205848	Unspecified
CP044421	206177	206250	Simple_repeat
CP044421	207312	207343	Simple_repeat
CP044421	207924	207976	Simple_repeat
CP044421	207925	207976	Simple_repeat
CP044421	209217	209281	Simple_repeat
CP044421	210278	210337	Simple_repeat
CP044421	213864	213928	Simple_repeat
CP044421	215612	215647	Simple_repeat
CP044421	215660	215729	Simple_repeat
CP044421	216206	216247	Simple_repeat
CP044421	217176	217213	Simple_repeat
CP044421	217229	217261	Simple_repeat
CP044421	217770	217836	Simple_repeat
CP044421	217865	217890	Simple_repeat
CP044421	219201	219246	Simple_repeat
CP044421	219720	219775	Simple_repeat
CP044421	219960	220026	Simple_repeat
CP044421	220511	220541	Simple_repeat
CP044421	220966	220995	Simple_repeat
CP044421	221072	221146	Simple_repeat
CP044421	221628	221705	Simple_repeat
CP044421	221993	222022	Simple_repeat
CP044421	222220	222246	Simple_repeat
CP044421	222269	222306	Simple_repeat
CP044421	223499	223526	Simple_repeat
CP044421	223904	224052	Simple_repeat
CP044421	224447	224480	Simple_repeat
CP044421	224722	224766	Simple_repeat
CP044421	225294	225380	Simple_repeat
CP044421	225585	225739	Simple_repeat
CP044421	226041	226076	Simple_repeat
CP044421	226275	226353	Simple_repeat
CP044421	226339	226375	Simple_repeat
CP044421	226380	226431	Simple_repeat
CP044421	226482	226580	Simple_repeat
CP044421	226650	226682	Simple_repeat
CP044421	227060	227099	Simple_repeat
CP044421	227240	227273	Simple_repeat
CP044421	227521	227553	Simple_repeat
CP044421	227558	227583	Simple_repeat
CP044421	227717	227738	Simple_repeat
CP044421	227835	227897	Simple_repeat
CP044421	228281	228319	Simple_repeat
CP044421	228331	228393	Simple_repeat
CP044421	228406	228445	Simple_repeat
CP044421	228616	228683	Simple_repeat
CP044421	229010	229078	Unspecified
CP044421	229023	229089	Unspecified
CP044421	229389	229469	Simple_repeat
CP044421	229391	229468	Simple_repeat
CP044421	229482	229509	Simple_repeat
CP044421	229739	229764	Simple_repeat
CP044421	229948	229972	Simple_repeat
CP044421	230752	230805	Simple_repeat
CP044421	230753	230821	Simple_repeat
CP044421	231132	231156	Simple_repeat
CP044421	231157	231187	Simple_repeat
CP044421	231188	231205	Simple_repeat
CP044421	231205	231226	Simple_repeat
CP044421	231329	231352	Simple_repeat
CP044421	231642	231705	Unspecified
CP044421	231646	231714	Unspecified
CP044421	231658	231726	Unspecified
CP044421	231758	231803	Simple_repeat
CP044421	231826	231866	Simple_repeat
CP044421	232458	232491	Simple_repeat
CP044421	232973	233034	Simple_repeat
CP044421	234489	234539	Simple_repeat
CP044421	234831	234865	Simple_repeat
CP044421	237066	237223	Simple_repeat
CP044421	237364	237449	Simple_repeat
CP044421	237825	237874	Simple_repeat
CP044421	237838	237900	Simple_repeat
CP044421	239105	239137	Simple_repeat
CP044421	243414	243456	Simple_repeat
CP044421	243722	243742	Simple_repeat
CP044421	244679	244710	Simple_repeat
CP044421	245773	245808	Simple_repeat
CP044421	245931	245987	Simple_repeat
CP044421	247175	247198	Simple_repeat
CP044421	247199	247230	Simple_repeat
CP044421	247497	247545	Simple_repeat
CP044421	247636	247683	Simple_repeat
CP044421	248254	248326	Simple_repeat
CP044421	248581	248639	Unspecified
CP044421	248584	248652	Unspecified
CP044421	249322	249366	Simple_repeat
CP044421	249517	249551	Simple_repeat
CP044421	249521	249554	Simple_repeat
CP044421	251580	251660	Simple_repeat
CP044421	254325	254342	Simple_repeat
CP044421	259397	259461	Simple_repeat
CP044421	259883	259914	Simple_repeat
CP044421	262416	262504	Simple_repeat
CP044421	262568	262627	Simple_repeat
CP044421	264142	264232	Simple_repeat
CP044421	264642	264715	Simple_repeat
CP044421	265325	265360	Simple_repeat
CP044421	266605	266660	Simple_repeat
CP044421	269041	269073	Simple_repeat
CP044421	269372	269416	Simple_repeat
CP044421	281778	281841	Simple_repeat
CP044421	282741	282785	Simple_repeat
CP044421	284040	284094	Simple_repeat
CP044421	284192	284267	Simple_repeat
CP044421	286455	286487	Simple_repeat
CP044421	287061	287116	Simple_repeat
CP044421	287273	287323	Simple_repeat
CP044421	290616	290650	Simple_repeat
CP044421	291622	291682	Simple_repeat
CP044421	293546	293691	Simple_repeat
CP044421	295261	295414	Simple_repeat
CP044421	296607	296653	Simple_repeat
CP044421	297729	297757	Simple_repeat
CP044421	298226	298313	Simple_repeat
CP044421	299288	299357	Simple_repeat
CP044421	299312	299353	Simple_repeat
CP044421	301493	301574	Simple_repeat
CP044421	302446	302480	Simple_repeat
CP044421	302659	302696	Simple_repeat
CP044421	303616	303650	Simple_repeat
CP044421	308306	308337	Simple_repeat
CP044421	308775	308805	Simple_repeat
CP044421	311884	311918	Simple_repeat
CP044421	311885	311917	Simple_repeat
CP044421	314299	314330	Simple_repeat
CP044421	318488	318548	Simple_repeat
CP044421	318887	318924	Simple_repeat
CP044421	318889	318934	Simple_repeat
CP044421	319813	319857	Simple_repeat
CP044421	323616	323639	Simple_repeat
CP044421	325063	325112	Simple_repeat
CP044421	327639	327670	Simple_repeat
CP044421	328664	328703	Simple_repeat
CP044421	333011	333048	Simple_repeat
CP044421	334011	334065	Simple_repeat
CP044421	334031	334095	Simple_repeat
CP044421	334106	334148	Simple_repeat
CP044421	334238	334282	Simple_repeat
CP044421	334461	334502	Simple_repeat
CP044421	334732	334748	Simple_repeat
CP044421	334752	334817	Simple_repeat
CP044421	335268	335349	Simple_repeat
CP044421	336122	336268	Simple_repeat
CP044421	337139	337187	Simple_repeat
CP044421	341461	341510	Simple_repeat
CP044421	342269	342335	Simple_repeat
CP044421	343984	344017	Simple_repeat
CP044421	345534	345580	Simple_repeat
CP044421	347736	347782	Simple_repeat
CP044421	351934	351990	Simple_repeat
CP044421	363678	363711	Simple_repeat
CP044421	364127	364158	Simple_repeat
CP044421	364936	364970	Simple_repeat
CP044421	366251	366286	Simple_repeat
CP044421	369105	369133	Simple_repeat
CP044421	372681	372719	Simple_repeat
CP044421	376233	376280	Simple_repeat
CP044421	382781	382804	Simple_repeat
CP044421	390117	390157	Simple_repeat
CP044421	396093	396144	Simple_repeat
CP044421	396099	396148	Simple_repeat
CP044421	404283	404316	Simple_repeat
CP044421	404284	404315	Simple_repeat
CP044421	404622	404670	Simple_repeat
CP044421	407803	407838	Simple_repeat
CP044421	407807	407851	Simple_repeat
CP044421	409956	409985	Simple_repeat
CP044421	412916	412945	Simple_repeat
CP044421	434462	434505	Simple_repeat
CP044421	437433	437488	Simple_repeat
CP044421	453435	453477	Simple_repeat
CP044421	459045	459084	Simple_repeat
CP044421	464106	464155	Simple_repeat
CP044421	465639	465673	Simple_repeat
CP044421	466466	466491	Simple_repeat
CP044421	470460	470500	Simple_repeat
CP044421	470666	470691	Simple_repeat
CP044421	470842	470888	Simple_repeat
CP044421	472900	472963	Simple_repeat
CP044421	489650	489723	Simple_repeat
CP044421	489669	489724	Simple_repeat
CP044421	491679	491726	Simple_repeat
CP044421	497752	497804	Simple_repeat
CP044421	500859	500884	Simple_repeat
CP044421	501015	501040	Simple_repeat
CP044421	526167	526184	Simple_repeat
CP044421	534190	534255	Simple_repeat
CP044421	543115	543134	Simple_repeat
CP044421	560720	560775	Simple_repeat
CP044421	570580	570613	Simple_repeat
CP044421	574988	575011	Simple_repeat
CP044421	575011	575067	Simple_repeat
CP044421	586079	586116	Simple_repeat
CP044421	586391	586424	Simple_repeat
CP044421	588257	588311	Simple_repeat
CP044421	592251	592280	Simple_repeat
CP044421	594078	594124	Simple_repeat
CP044421	596190	596228	Simple_repeat
CP044421	603070	603102	Simple_repeat
CP044421	609943	609980	Simple_repeat
CP044421	617001	617057	Simple_repeat
CP044421	617636	617673	Simple_repeat
CP044421	631818	631852	Simple_repeat
CP044421	633120	633163	Simple_repeat
CP044421	635384	635402	Simple_repeat
CP044421	637874	637903	Simple_repeat
CP044421	651647	651690	Simple_repeat
CP044421	651650	651708	Simple_repeat
CP044421	651776	651810	Simple_repeat
CP044421	659521	659585	Simple_repeat
CP044421	659544	659583	Simple_repeat
CP044421	661001	661052	Simple_repeat
CP044421	673161	673213	Simple_repeat
CP044421	677643	677670	Simple_repeat
CP044421	683458	683498	Simple_repeat
CP044421	683976	683997	Simple_repeat
CP044421	684728	684769	Simple_repeat
CP044421	685091	685123	Simple_repeat
CP044421	685320	685388	Simple_repeat
CP044421	685395	685451	Simple_repeat
CP044421	685649	685679	Simple_repeat
CP044421	685764	685798	Simple_repeat
CP044421	687882	687924	Simple_repeat
CP044421	690874	690911	Simple_repeat
CP044421	707121	707166	Simple_repeat
CP044421	710828	710850	Simple_repeat
CP044421	713212	713241	Simple_repeat
CP044421	724017	724104	Simple_repeat
CP044421	724311	724336	Simple_repeat
CP044421	724883	724909	Simple_repeat
CP044421	737045	737073	Simple_repeat
CP044421	737387	737407	Simple_repeat
CP044421	739055	739113	Simple_repeat
CP044421	744214	744251	Simple_repeat
CP044421	746567	746588	Simple_repeat
CP044421	750959	751026	Simple_repeat
CP044421	760353	760401	Unspecified
CP044421	760362	760425	Unspecified
CP044421	760849	760944	Simple_repeat
CP044421	767036	767083	Simple_repeat
CP044421	767855	767913	Simple_repeat
CP044421	768654	768689	Simple_repeat
CP044421	777835	777878	Simple_repeat
CP044421	778027	778056	Simple_repeat
CP044421	785156	785199	Simple_repeat
CP044421	785256	785322	Simple_repeat
CP044421	787062	787098	Simple_repeat
CP044421	787206	787262	Simple_repeat
CP044421	787232	787261	Simple_repeat
CP044421	787969	787992	Simple_repeat
CP044421	793847	793868	Simple_repeat
CP044421	800970	801012	Simple_repeat
CP044421	807204	807245	Simple_repeat
CP044421	807827	807864	Simple_repeat
CP044421	809549	809601	Simple_repeat
CP044421	812539	812624	Simple_repeat
CP044421	812731	812782	Simple_repeat
CP044421	815981	816018	Simple_repeat
CP044421	819358	819525	Simple_repeat
CP044421	820381	820450	Simple_repeat
CP044421	820791	820824	Simple_repeat
CP044421	820851	820874	Simple_repeat
CP044421	821295	821347	Simple_repeat
CP044421	821398	821498	Simple_repeat
CP044421	821528	821590	Simple_repeat
CP044421	821607	821665	Simple_repeat
CP044421	821978	822008	Simple_repeat
CP044421	822206	822330	Simple_repeat
CP044421	823061	823102	Simple_repeat
CP044421	823587	823608	Simple_repeat
CP044421	824062	824160	Simple_repeat
CP044421	824112	824158	Simple_repeat
CP044421	824334	824454	Simple_repeat
CP044421	824362	824482	Simple_repeat
CP044421	824608	824661	Simple_repeat
CP044421	824682	824755	Simple_repeat
CP044421	824683	824769	Simple_repeat
CP044421	825201	825226	Simple_repeat
CP044421	825234	825321	Simple_repeat
CP044421	825386	825414	Simple_repeat
CP044421	826077	826119	Simple_repeat
CP044421	826476	826544	Unspecified
CP044421	826485	826553	Unspecified
CP044421	826494	826561	Unspecified
CP044421	826503	826571	Unspecified
CP044421	826516	826578	Unspecified
CP044421	826844	826894	Simple_repeat
CP044421	826993	827033	Simple_repeat
CP044421	827760	827818	Simple_repeat
CP044421	827860	827893	Simple_repeat
CP044421	828357	828391	Simple_repeat
CP044421	828522	828554	Simple_repeat
CP044421	828735	828779	Simple_repeat
CP044421	828896	828948	Simple_repeat
CP044421	829000	829041	Simple_repeat
CP044421	829008	829063	Simple_repeat
CP044421	829802	829827	Simple_repeat
CP044421	832374	832409	Simple_repeat
CP044421	833519	833559	Simple_repeat
CP044421	835132	835169	Simple_repeat
CP044421	835288	835309	Simple_repeat
CP044421	837117	837179	Simple_repeat
CP044421	837852	837889	Simple_repeat
CP044421	839188	839239	Simple_repeat
CP044421	841719	841774	Simple_repeat
CP044421	842076	842117	Simple_repeat
CP044421	844274	844303	Simple_repeat
CP044421	845407	845423	Simple_repeat
CP044421	846056	846114	Simple_repeat
CP044421	846127	846166	Simple_repeat
CP044421	847971	848051	Simple_repeat
CP044421	850016	850053	Simple_repeat
CP044421	850017	850038	Simple_repeat
CP044421	850434	850505	Simple_repeat
CP044421	851719	851757	Simple_repeat
CP044421	852469	852503	Simple_repeat
CP044421	852646	852680	Simple_repeat
CP044421	852652	852687	Simple_repeat
CP044421	852665	852699	Simple_repeat
CP044421	853343	853376	Simple_repeat
CP044421	854144	854206	Simple_repeat
CP044421	854792	854843	Simple_repeat
CP044421	856073	856133	Simple_repeat
CP044421	857061	857091	Simple_repeat
CP044421	857753	857783	Simple_repeat
CP044421	859154	859188	Simple_repeat
CP044421	859553	859607	Simple_repeat
CP044421	859794	859830	Simple_repeat
CP044421	859832	859869	Simple_repeat
CP044421	860023	860060	Simple_repeat
CP044421	860837	860887	Simple_repeat
CP044421	864867	864908	Simple_repeat
CP044421	869428	869466	Simple_repeat
CP044421	869713	869750	Simple_repeat
CP044421	873154	873212	Simple_repeat
CP044421	874198	874266	Simple_repeat
CP044421	874545	874609	Simple_repeat
CP044421	874748	874851	Simple_repeat
CP044421	876547	876654	Simple_repeat
CP044421	877293	877332	Simple_repeat
CP044421	877505	877546	Simple_repeat
CP044421	877816	877871	Simple_repeat
CP044421	878594	878633	Simple_repeat
CP044421	878828	878870	Simple_repeat
CP044421	878951	878998	Simple_repeat
CP044421	879600	879626	Simple_repeat
CP044421	880159	880186	Simple_repeat
CP044421	880464	880587	Simple_repeat
CP044421	880980	881020	Simple_repeat
CP044421	880988	881019	Simple_repeat
CP044421	881001	881102	Simple_repeat
CP044421	881379	881450	Simple_repeat
CP044421	881411	881507	Simple_repeat
CP044421	882060	882082	Simple_repeat
CP044421	882511	882530	Simple_repeat
CP044421	882677	882725	Simple_repeat
CP044421	882895	882948	Simple_repeat
CP044421	883302	883332	Simple_repeat
CP044421	883377	883418	Simple_repeat
CP044421	883377	883416	Simple_repeat
CP044421	883444	883533	Simple_repeat
CP044421	883460	883548	Simple_repeat
CP044421	883938	883977	Simple_repeat
CP044421	884208	884264	Simple_repeat
CP044421	884433	884485	Simple_repeat
CP044421	884435	884451	Simple_repeat
CP044421	884766	884809	Simple_repeat
CP044421	884910	884944	Simple_repeat
CP044421	889715	889778	Simple_repeat
CP044421	892506	892670	Simple_repeat
CP044421	896991	897031	Simple_repeat
CP044421	897436	897484	Simple_repeat
CP044421	903098	903131	Simple_repeat
CP044421	906806	906868	Simple_repeat
CP044421	906950	907032	Simple_repeat
CP044421	907551	907572	Simple_repeat
CP044421	907573	907628	Simple_repeat
CP044421	907629	907696	Simple_repeat
CP044421	907981	908037	Simple_repeat
CP044421	910515	910579	Simple_repeat
CP044421	911440	911478	Simple_repeat
CP044421	911621	911686	Unspecified
CP044421	911689	911786	Simple_repeat
CP044421	911728	911786	Simple_repeat
CP044421	913326	913347	Simple_repeat
CP044421	914418	914454	Simple_repeat
CP044421	915487	915519	Simple_repeat
CP044421	918549	918584	Simple_repeat
CP044421	918665	918690	Simple_repeat
CP044421	920997	921038	Simple_repeat
CP044421	923309	923340	Simple_repeat
CP044421	923830	923883	Simple_repeat
CP044421	924973	925006	Simple_repeat
CP044421	924973	925004	Simple_repeat
CP044421	925980	926039	Simple_repeat
CP044421	926707	926747	Simple_repeat
CP044421	927189	927255	Simple_repeat
CP044421	927455	927504	Simple_repeat
CP044421	928603	928645	Simple_repeat
CP044421	928604	928657	Simple_repeat
CP044421	928755	928792	Simple_repeat
CP044421	929339	929381	Simple_repeat
CP044421	929439	929486	Simple_repeat
CP044421	929984	930010	Simple_repeat
CP044421	930466	930499	Simple_repeat
CP044421	932278	932298	Simple_repeat
CP044421	933806	933847	Simple_repeat
CP044421	933831	933926	Simple_repeat
CP044421	935391	935478	Simple_repeat
CP044421	935393	935435	Simple_repeat
CP044421	935541	935572	Simple_repeat
CP044421	936001	936026	Simple_repeat
CP044421	938723	938747	Simple_repeat
CP044421	938748	938821	Unspecified
CP044421	938762	938831	Unspecified
CP044421	938772	938833	Unspecified
CP044421	938984	939019	Simple_repeat
CP044421	939370	939419	Simple_repeat
CP044421	941467	941493	Simple_repeat
CP044421	943065	943096	Simple_repeat
CP044421	943599	943647	Simple_repeat
CP044421	952535	952587	Simple_repeat
CP044421	961710	961755	Simple_repeat
CP044421	961712	961747	Simple_repeat
CP044421	966214	966267	Simple_repeat
CP044421	969332	969368	Simple_repeat
CP044421	970687	970740	Simple_repeat
CP044421	973479	973532	Simple_repeat
CP044421	975088	975144	Simple_repeat
CP044421	975099	975140	Simple_repeat
CP044421	976212	976270	Simple_repeat
CP044421	976391	976421	Simple_repeat
CP044421	976512	976553	Simple_repeat
CP044421	976813	976833	Simple_repeat
CP044421	977237	977270	Simple_repeat
CP044421	977456	977479	Simple_repeat
CP044421	978538	978556	Simple_repeat
CP044421	979778	979814	Simple_repeat
CP044421	979932	979966	Simple_repeat
CP044421	980131	980175	Simple_repeat
CP044421	981413	981460	Simple_repeat
CP044421	981548	981612	Simple_repeat
CP044421	982035	982065	Simple_repeat
CP044421	982718	982784	Simple_repeat
CP044421	983808	983871	Simple_repeat
CP044421	984818	984867	Simple_repeat
CP044421	985340	985376	Simple_repeat
CP044421	985341	985373	Simple_repeat
CP044421	986402	986429	Simple_repeat
CP044421	988546	988566	Simple_repeat
CP044421	990040	990056	Simple_repeat
CP044421	991076	991138	Simple_repeat
CP044421	992233	992698	Simple_repeat
CP044420	5	496	Simple_repeat
CP044420	1168	1427	Simple_repeat
CP044420	1964	2055	Simple_repeat
CP044420	1964	2052	Simple_repeat
CP044420	3862	3907	Simple_repeat
CP044420	4199	4233	Simple_repeat
CP044420	4709	4760	Simple_repeat
CP044420	5156	5190	Simple_repeat
CP044420	7005	7052	Simple_repeat
CP044420	11517	11558	Simple_repeat
CP044420	17365	17423	Simple_repeat
CP044420	19795	19866	Simple_repeat
CP044420	20856	20908	Simple_repeat
CP044420	21009	21046	Simple_repeat
CP044420	26070	26108	Simple_repeat
CP044420	41410	41459	Simple_repeat
CP044420	41521	41576	Simple_repeat
CP044420	66406	66435	Simple_repeat
CP044420	66408	66442	Simple_repeat
CP044420	66961	66984	Simple_repeat
CP044420	68196	68229	Simple_repeat
CP044420	71585	71614	Simple_repeat
CP044420	73044	73112	Unspecified
CP044420	73053	73120	Unspecified
CP044420	73061	73126	Unspecified
CP044420	73077	73143	Unspecified
CP044420	73087	73153	Unspecified
CP044420	73257	73315	Simple_repeat
CP044420	73369	73449	Simple_repeat
CP044420	73404	73486	Simple_repeat
CP044420	73410	73486	Simple_repeat
CP044420	73414	73449	Simple_repeat
CP044420	74596	74708	Simple_repeat
CP044420	74741	74807	Simple_repeat
CP044420	74772	74816	Simple_repeat
CP044420	74859	74944	Simple_repeat
CP044420	77110	77194	Simple_repeat
CP044420	77444	77476	Simple_repeat
CP044420	77728	77787	Simple_repeat
CP044420	77952	78011	Simple_repeat
CP044420	78296	78378	Simple_repeat
CP044420	78711	78735	Simple_repeat
CP044420	79837	79877	Simple_repeat
CP044420	80141	80158	Simple_repeat
CP044420	80264	80296	Simple_repeat
CP044420	80585	80615	Simple_repeat
CP044420	80902	80948	Simple_repeat
CP044420	81065	81118	Simple_repeat
CP044420	81452	81488	Simple_repeat
CP044420	81790	81839	Simple_repeat
CP044420	82695	82726	Simple_repeat
CP044420	83569	83651	Simple_repeat
CP044420	84646	84762	Simple_repeat
CP044420	86161	86246	Simple_repeat
CP044420	86728	86761	Simple_repeat
CP044420	89264	89309	Simple_repeat
CP044420	89331	89380	Simple_repeat
CP044420	90579	90606	Simple_repeat
CP044420	91508	91550	Simple_repeat
CP044420	92301	92354	Simple_repeat
CP044420	98267	98324	Simple_repeat
CP044420	99769	99829	Simple_repeat
CP044420	103147	103168	Simple_repeat
CP044420	104613	104643	Simple_repeat
CP044420	105540	105606	Simple_repeat
CP044420	106458	106476	Simple_repeat
CP044420	106698	106729	Simple_repeat
CP044420	110883	110941	Simple_repeat
CP044420	113969	114012	Simple_repeat
CP044420	113971	114010	Simple_repeat
CP044420	117080	117121	Simple_repeat
CP044420	117263	117321	Simple_repeat
CP044420	126006	126043	Simple_repeat
CP044420	127133	127153	Simple_repeat
CP044420	127545	127562	Simple_repeat
CP044420	127563	127649	Simple_repeat
CP044420	127650	127655	Simple_repeat
CP044420	127808	127852	Simple_repeat
CP044420	131042	131095	Simple_repeat
CP044420	139194	139228	Simple_repeat
CP044420	139650	139680	Simple_repeat
CP044420	140792	140838	Simple_repeat
CP044420	145953	145974	Simple_repeat
CP044420	148884	148937	Simple_repeat
CP044420	148884	148920	Simple_repeat
CP044420	149990	150024	Simple_repeat
CP044420	150116	150155	Simple_repeat
CP044420	153220	153253	Simple_repeat
CP044420	165440	165481	Simple_repeat
CP044420	165442	165486	Simple_repeat
CP044420	165494	165539	Simple_repeat
CP044420	173460	173514	Simple_repeat
CP044420	185125	185196	Simple_repeat
CP044420	185650	185684	Simple_repeat
CP044420	187423	187490	Unspecified
CP044420	187431	187499	Unspecified
CP044420	187446	187514	Unspecified
CP044420	188288	188339	Simple_repeat
CP044420	188545	188574	Simple_repeat
CP044420	189735	190293	Simple_repeat
CP044420	190696	190722	Simple_repeat
CP044420	191059	191091	Simple_repeat
CP044420	191316	191344	Simple_repeat
CP044420	191870	191994	Simple_repeat
CP044420	192161	192180	Simple_repeat
CP044420	195436	195467	Simple_repeat
CP044420	197376	197403	Simple_repeat
CP044420	199498	199566	Simple_repeat
CP044420	207834	207871	Simple_repeat
CP044420	208946	208989	Simple_repeat
CP044420	214290	214362	Simple_repeat
CP044420	220455	220498	Simple_repeat
CP044420	223119	223161	Simple_repeat
CP044420	229699	229730	Simple_repeat
CP044420	231594	231636	Simple_repeat
CP044420	233494	233548	Simple_repeat
CP044420	235424	235471	Simple_repeat
CP044420	237325	237362	Simple_repeat
CP044420	239282	239300	Unspecified
CP044420	239301	239359	Simple_repeat
CP044420	239360	239404	Unspecified
CP044420	239360	239393	Unspecified
CP044420	239560	239604	Simple_repeat
CP044420	240855	240915	Simple_repeat
CP044420	241264	241332	Unspecified
CP044420	241287	241353	Unspecified
CP044420	241297	241365	Unspecified
CP044420	241309	241377	Unspecified
CP044420	241320	241384	Unspecified
CP044420	241330	241398	Unspecified
CP044420	241339	241407	Unspecified
CP044420	241348	241416	Unspecified
CP044420	241362	241428	Unspecified
CP044420	241429	241456	Simple_repeat
CP044420	241458	241522	Unspecified
CP044420	241468	241534	Unspecified
CP044420	241536	241565	Simple_repeat
CP044420	241566	241632	Unspecified
CP044420	241597	241663	Unspecified
CP044420	241664	241692	Simple_repeat
CP044420	241693	241761	Unspecified
CP044420	241711	241777	Unspecified
CP044420	241726	241794	Unspecified
CP044420	241738	241804	Unspecified
CP044420	241805	241900	Simple_repeat
CP044420	241903	241971	Unspecified
CP044420	241926	241992	Unspecified
CP044420	241939	242007	Unspecified
CP044420	241948	242016	Unspecified
CP044420	241962	242026	Unspecified
CP044420	242027	242051	Simple_repeat
CP044420	242052	242116	Unspecified
CP044420	242118	242245	Simple_repeat
CP044420	242248	242316	Unspecified
CP044420	242257	242325	Unspecified
CP044420	242754	242792	Simple_repeat
CP044420	243359	243385	Simple_repeat
CP044420	243386	243426	Simple_repeat
CP044420	243940	243982	Simple_repeat
CP044420	244281	244313	Simple_repeat
CP044420	244372	244397	Simple_repeat
CP044420	245137	245166	Simple_repeat
CP044420	246250	246271	Simple_repeat
CP044420	248170	248196	Simple_repeat
CP044420	250255	250305	Simple_repeat
CP044420	250257	250305	Simple_repeat
CP044420	252031	252052	Simple_repeat
CP044420	253918	253940	Simple_repeat
CP044420	253941	253985	Simple_repeat
CP044420	256266	256305	Simple_repeat
CP044420	256528	256554	Simple_repeat
CP044420	258881	258919	Simple_repeat
CP044420	258884	258942	Simple_repeat
CP044420	259104	259166	Simple_repeat
CP044420	261413	261494	Simple_repeat
CP044420	261911	261948	Simple_repeat
CP044420	264068	264102	Simple_repeat
CP044420	271713	271776	Simple_repeat
CP044420	272345	272398	Simple_repeat
CP044420	273310	273390	Simple_repeat
CP044420	273629	273678	Simple_repeat
CP044420	274282	274321	Simple_repeat
CP044420	276901	276955	Simple_repeat
CP044420	277009	277084	Simple_repeat
CP044420	277011	277102	Simple_repeat
CP044420	282318	282341	Simple_repeat
CP044420	283987	284031	Simple_repeat
CP044420	284140	284156	Simple_repeat
CP044420	286631	286663	Simple_repeat
CP044420	290616	290635	Simple_repeat
CP044420	290802	290821	Simple_repeat
CP044420	293570	293608	Simple_repeat
CP044420	293775	293820	Simple_repeat
CP044420	293789	293820	Simple_repeat
CP044420	294789	294833	Simple_repeat
CP044420	295119	295164	Simple_repeat
CP044420	299525	299563	Simple_repeat
CP044420	301295	301351	Simple_repeat
CP044420	303377	303396	Simple_repeat
CP044420	304992	305048	Simple_repeat
CP044420	308497	308556	Simple_repeat
CP044420	308697	308742	Simple_repeat
CP044420	308990	309039	Simple_repeat
CP044420	308991	309066	Simple_repeat
CP044420	309860	309906	Simple_repeat
CP044420	313435	313469	Simple_repeat
CP044420	315300	315350	Simple_repeat
CP044420	315301	315348	Simple_repeat
CP044420	315435	315476	Simple_repeat
CP044420	315977	316048	Simple_repeat
CP044420	315981	316049	Simple_repeat
CP044420	316238	316256	Simple_repeat
CP044420	317393	317461	Simple_repeat
CP044420	317636	317741	Simple_repeat
CP044420	317713	317780	Simple_repeat
CP044420	317864	317881	Simple_repeat
CP044420	317989	318057	Simple_repeat
CP044420	318847	318915	Simple_repeat
CP044420	319641	319674	Simple_repeat
CP044420	322141	322165	Simple_repeat
CP044420	326139	326208	Simple_repeat
CP044420	331610	331642	Simple_repeat
CP044420	333643	333694	Simple_repeat
CP044420	333657	333693	Simple_repeat
CP044420	334207	334277	Simple_repeat
CP044420	335135	335189	Simple_repeat
CP044420	335848	335911	Simple_repeat
CP044420	336103	336155	Simple_repeat
CP044420	337216	337271	Simple_repeat
CP044420	337370	337422	Simple_repeat
CP044420	338232	338266	Simple_repeat
CP044420	340354	340582	Simple_repeat
CP044420	346285	346407	Simple_repeat
CP044420	346739	346776	Simple_repeat
CP044420	347915	347938	Simple_repeat
CP044420	347938	347960	Simple_repeat
CP044420	350248	350330	Simple_repeat
CP044420	351667	351707	Simple_repeat
CP044420	351995	352037	Simple_repeat
CP044420	352041	352082	Simple_repeat
CP044420	352188	352278	Simple_repeat
CP044420	352314	352382	Simple_repeat
CP044420	352323	352360	Simple_repeat
CP044420	352687	352761	Simple_repeat
CP044420	352876	352949	Unspecified
CP044420	352885	352959	Unspecified
CP044420	352894	352965	Unspecified
CP044420	352911	352979	Unspecified
CP044420	362058	362094	Simple_repeat
CP044420	362058	362087	Simple_repeat
CP044420	364692	364739	Simple_repeat
CP044420	365519	365580	Simple_repeat
CP044420	370533	370558	Simple_repeat
CP044420	372131	372171	Simple_repeat
CP044420	372613	372637	Simple_repeat
CP044420	372660	372696	Simple_repeat
CP044420	375303	375351	Simple_repeat
CP044420	375310	375360	Simple_repeat
CP044420	377001	377138	Simple_repeat
CP044420	377456	377516	Simple_repeat
CP044420	379932	379996	Simple_repeat
CP044420	381489	381536	Simple_repeat
CP044420	382194	382230	Simple_repeat
CP044420	382552	382586	Simple_repeat
CP044420	392586	392613	Simple_repeat
CP044420	395435	395504	Simple_repeat
CP044420	397009	397059	Simple_repeat
CP044420	406230	406280	Simple_repeat
CP044420	411511	411543	Simple_repeat
CP044420	417284	417328	Simple_repeat
CP044420	418722	418758	Simple_repeat
CP044420	421265	421308	Simple_repeat
CP044420	426446	426577	Simple_repeat
CP044420	426722	426806	Simple_repeat
CP044420	426812	426877	Unspecified
CP044420	427957	427981	Simple_repeat
CP044420	429351	429453	Simple_repeat
CP044420	429454	429497	Simple_repeat
CP044420	429498	429585	Simple_repeat
CP044420	430241	430295	Simple_repeat
CP044420	431134	431229	Simple_repeat
CP044420	431757	431826	Simple_repeat
CP044420	433937	433953	Simple_repeat
CP044420	435527	435554	Simple_repeat
CP044420	438788	438815	Simple_repeat
CP044420	444060	444101	Simple_repeat
CP044420	446384	446444	Simple_repeat
CP044420	447328	447385	Simple_repeat
CP044420	450982	451050	Unspecified
CP044420	450991	451060	Unspecified
CP044420	451001	451071	Unspecified
CP044420	451014	451077	Unspecified
CP044420	454708	454727	Simple_repeat
CP044420	457233	457249	Simple_repeat
CP044420	458535	458557	Simple_repeat
CP044420	462981	463009	Simple_repeat
CP044420	463042	463075	Simple_repeat
CP044420	463054	463107	Simple_repeat
CP044420	464959	464988	Simple_repeat
CP044420	472722	472780	Simple_repeat
CP044420	476629	476671	Simple_repeat
CP044420	476901	476936	Simple_repeat
CP044420	479463	479517	Simple_repeat
CP044420	479741	479769	Simple_repeat
CP044420	479770	479805	Simple_repeat
CP044420	479806	479815	Simple_repeat
CP044420	505459	505509	Simple_repeat
CP044420	526001	526050	Simple_repeat
CP044420	535598	535637	Simple_repeat
CP044420	535757	535799	Simple_repeat
CP044420	540444	540470	Simple_repeat
CP044420	540575	540612	Simple_repeat
CP044420	547020	547059	Simple_repeat
CP044420	557405	557464	Simple_repeat
CP044420	559386	559448	Simple_repeat
CP044420	559488	559519	Simple_repeat
CP044420	560843	560875	Simple_repeat
CP044420	565914	565952	Simple_repeat
CP044420	570580	570627	Simple_repeat
CP044420	599539	599591	Simple_repeat
CP044420	599711	599786	Simple_repeat
CP044420	605409	605443	Simple_repeat
CP044420	606784	606820	Simple_repeat
CP044420	606902	606968	Simple_repeat
CP044420	627012	627055	Simple_repeat
CP044420	627213	627247	Simple_repeat
CP044420	627214	627251	Simple_repeat
CP044420	637860	637892	Simple_repeat
CP044420	641416	641464	Simple_repeat
CP044420	656491	656509	Simple_repeat
CP044420	657849	657875	Simple_repeat
CP044420	675428	675480	Simple_repeat
CP044420	678179	678208	Simple_repeat
CP044420	682429	682466	Simple_repeat
CP044420	690256	690321	Simple_repeat
CP044420	690278	690318	Simple_repeat
CP044420	703412	703464	Simple_repeat
CP044420	709290	709315	Simple_repeat
CP044420	713716	713752	Simple_repeat
CP044420	727957	728007	Simple_repeat
CP044420	732925	732979	Simple_repeat
CP044420	744348	744399	Simple_repeat
CP044420	758009	758048	Simple_repeat
CP044420	760911	760943	Simple_repeat
CP044420	770910	770951	Simple_repeat
CP044420	771016	771063	Simple_repeat
CP044420	776500	776524	Simple_repeat
CP044420	778468	778506	Simple_repeat
CP044420	786391	786445	Simple_repeat
CP044420	794441	794473	Simple_repeat
CP044420	795164	795226	Simple_repeat
CP044420	795546	795595	Simple_repeat
CP044420	803961	804002	Simple_repeat
CP044420	803971	804020	Simple_repeat
CP044420	804022	804076	Simple_repeat
CP044420	821260	821416	Simple_repeat
CP044420	822620	822649	Simple_repeat
CP044420	828687	828738	Simple_repeat
CP044420	832732	832786	Simple_repeat
CP044420	833201	833236	Simple_repeat
CP044420	833214	833244	Simple_repeat
CP044420	836124	836160	Simple_repeat
CP044420	839452	839488	Simple_repeat
CP044420	847983	848056	Simple_repeat
CP044420	853640	853678	Simple_repeat
CP044420	856947	856995	Simple_repeat
CP044420	858093	858135	Simple_repeat
CP044420	860477	860534	Simple_repeat
CP044420	868238	868315	Simple_repeat
CP044420	870570	870630	Simple_repeat
CP044420	871506	871545	Simple_repeat
CP044420	872185	872244	Simple_repeat
CP044420	872265	872355	Simple_repeat
CP044420	872964	873038	Simple_repeat
CP044420	873354	873431	Simple_repeat
CP044420	874198	874246	Simple_repeat
CP044420	883530	883560	Simple_repeat
CP044420	888115	888151	Simple_repeat
CP044420	889466	889491	Simple_repeat
CP044420	892696	892778	Simple_repeat
CP044420	894235	894271	Simple_repeat
CP044420	895498	895553	Simple_repeat
CP044420	895499	895543	Simple_repeat
CP044420	897559	897587	Simple_repeat
CP044420	897662	897689	Simple_repeat
CP044420	900479	900528	Simple_repeat
CP044420	905263	905296	Simple_repeat
CP044420	907006	907064	Simple_repeat
CP044420	907309	907358	Simple_repeat
CP044420	907316	907367	Simple_repeat
CP044420	908949	908977	Simple_repeat
CP044420	909306	909375	Simple_repeat
CP044420	910767	910813	Simple_repeat
CP044420	912274	912463	Simple_repeat
CP044420	912290	912463	Simple_repeat
CP044420	912981	913080	Simple_repeat
CP044420	914192	914232	Simple_repeat
CP044420	914591	914635	Simple_repeat
CP044420	914646	914670	Simple_repeat
CP044420	915021	915080	Simple_repeat
CP044420	915276	915396	Simple_repeat
CP044420	915669	915718	Simple_repeat
CP044420	916142	916157	Simple_repeat
CP044420	916158	916183	Simple_repeat
CP044420	916184	916234	Simple_repeat
CP044420	916517	916603	Simple_repeat
CP044420	917097	917130	Simple_repeat
CP044420	918370	918413	Simple_repeat
CP044420	919188	919218	Simple_repeat
CP044420	919469	919526	Simple_repeat
CP044420	921051	921089	Simple_repeat
CP044420	922357	922426	Simple_repeat
CP044420	923183	923218	Simple_repeat
CP044420	927597	927659	Simple_repeat
CP044420	929523	929548	Simple_repeat
CP044420	930078	930135	Simple_repeat
CP044420	930161	930229	Unspecified
CP044420	930240	930324	Simple_repeat
CP044420	930871	930957	Simple_repeat
CP044420	931338	931366	Simple_repeat
CP044420	931362	931413	Simple_repeat
CP044420	931729	931760	Simple_repeat
CP044420	931927	931960	Simple_repeat
CP044420	932753	932792	Simple_repeat
CP044420	935130	935158	Simple_repeat
CP044420	935318	935386	Simple_repeat
CP044420	935320	935382	Simple_repeat
CP044420	937265	937300	Simple_repeat
CP044420	939608	939654	Simple_repeat
CP044420	939981	940055	Simple_repeat
CP044420	940144	940205	Simple_repeat
CP044420	941535	941587	Simple_repeat
CP044420	942883	942935	Simple_repeat
CP044420	945665	945689	Simple_repeat
CP044420	946616	946681	Simple_repeat
CP044420	947420	947463	Simple_repeat
CP044420	948146	948200	Simple_repeat
CP044420	948613	948657	Simple_repeat
CP044420	949551	949604	Simple_repeat
CP044420	949554	949601	Simple_repeat
CP044420	949556	949603	Simple_repeat
CP044420	950305	950354	Simple_repeat
CP044420	950652	950731	Simple_repeat
CP044420	952382	952407	Simple_repeat
CP044420	952547	952578	Simple_repeat
CP044420	955526	955571	Simple_repeat
CP044420	957519	957558	Simple_repeat
CP044420	957586	957632	Simple_repeat
CP044420	957821	957913	Simple_repeat
CP044420	958028	958052	Simple_repeat
CP044420	958289	958337	Simple_repeat
CP044420	958292	958321	Simple_repeat
CP044420	958410	958505	Simple_repeat
CP044420	958781	958839	Simple_repeat
CP044420	960175	960218	Simple_repeat
CP044420	960960	961023	Simple_repeat
CP044420	962755	962781	Simple_repeat
CP044420	964197	964222	Simple_repeat
CP044420	964257	964291	Simple_repeat
CP044420	964315	964359	Unspecified
CP044420	968096	968116	Simple_repeat
CP044420	968724	968777	Simple_repeat
CP044420	972816	972951	Simple_repeat
CP044420	973285	973314	Simple_repeat
CP044420	980836	980859	Simple_repeat
CP044420	980924	980962	Simple_repeat
CP044420	981801	981825	Simple_repeat
CP044420	982910	982927	Simple_repeat
CP044420	985519	985599	Simple_repeat
CP044420	986605	986658	Simple_repeat
CP044420	987050	987093	Simple_repeat
CP044420	989477	989537	Simple_repeat
CP044420	990284	990314	Simple_repeat
CP044420	991690	991767	Simple_repeat
CP044420	991799	991846	Simple_repeat
CP044420	992070	992121	Simple_repeat
CP044420	992122	992146	Simple_repeat
CP044420	992147	992171	Simple_repeat
CP044420	992172	992354	Simple_repeat
CP044420	992355	992397	Simple_repeat
CP044420	992731	992771	Simple_repeat
CP044420	992963	993048	Simple_repeat
CP044420	995632	995701	Simple_repeat
CP044420	998232	998294	Simple_repeat
CP044420	999205	999260	Simple_repeat
CP044420	1000195	1000248	Simple_repeat
CP044420	1000210	1000244	Simple_repeat
CP044420	1000341	1000401	Simple_repeat
CP044420	1001753	1001781	Simple_repeat
CP044420	1003181	1003222	Simple_repeat
CP044420	1009397	1009462	Simple_repeat
CP044420	1009405	1009458	Simple_repeat
CP044420	1011912	1011947	Simple_repeat
CP044420	1019964	1019983	Simple_repeat
CP044420	1020877	1020927	Simple_repeat
CP044420	1023246	1023293	Simple_repeat
CP044420	1027209	1027244	Simple_repeat
CP044420	1033532	1033570	Simple_repeat
CP044420	1033637	1033676	Simple_repeat
CP044420	1034162	1034200	Simple_repeat
CP044420	1034469	1034506	Simple_repeat
CP044420	1034849	1034883	Simple_repeat
CP044420	1039552	1039606	Simple_repeat
CP044420	1040188	1040215	Simple_repeat
CP044420	1042347	1042461	Simple_repeat
CP044420	1061747	1061796	Simple_repeat
CP044420	1061768	1061793	Simple_repeat
CP044420	1067489	1067555	Simple_repeat
CP044420	1068435	1068477	Simple_repeat
CP044420	1072829	1072871	Simple_repeat
CP044420	1076529	1076571	Simple_repeat
CP044420	1080628	1080668	Simple_repeat
CP044420	1092837	1092861	Simple_repeat
CP044420	1098162	1098185	Simple_repeat
CP044420	1099484	1099559	Simple_repeat
CP044420	1101950	1102616	Simple_repeat
CP044419	1	664	Simple_repeat
CP044419	3493	3534	Simple_repeat
CP044419	3738	3776	Simple_repeat
CP044419	4362	4428	Simple_repeat
CP044419	7179	7223	Simple_repeat
CP044419	7662	7720	Simple_repeat
CP044419	14287	14330	Simple_repeat
CP044419	17048	17086	Simple_repeat
CP044419	17098	17125	Simple_repeat
CP044419	17363	17402	Simple_repeat
CP044419	27202	27272	Simple_repeat
CP044419	31860	31912	Simple_repeat
CP044419	32244	32276	Simple_repeat
CP044419	32712	32757	Simple_repeat
CP044419	33105	33146	Simple_repeat
CP044419	34996	35080	Simple_repeat
CP044419	40367	40411	Simple_repeat
CP044419	45047	45082	Simple_repeat
CP044419	48304	48337	Simple_repeat
CP044419	50009	50059	Simple_repeat
CP044419	51545	51577	Simple_repeat
CP044419	51997	52044	Simple_repeat
CP044419	52021	52092	Simple_repeat
CP044419	53854	53947	Simple_repeat
CP044419	54989	55020	Simple_repeat
CP044419	56412	56457	Simple_repeat
CP044419	56963	57000	Simple_repeat
CP044419	57270	57437	Simple_repeat
CP044419	57592	57642	Simple_repeat
CP044419	58178	58199	Simple_repeat
CP044419	59152	59193	Simple_repeat
CP044419	60176	60200	Simple_repeat
CP044419	61889	61917	Simple_repeat
CP044419	62004	62035	Simple_repeat
CP044419	62755	62780	Simple_repeat
CP044419	65352	65391	Simple_repeat
CP044419	66073	66138	Simple_repeat
CP044419	66449	66491	Simple_repeat
CP044419	68191	68214	Simple_repeat
CP044419	71213	71247	Simple_repeat
CP044419	71334	71376	Simple_repeat
CP044419	71905	71963	Simple_repeat
CP044419	71905	71949	Simple_repeat
CP044419	72469	72525	Simple_repeat
CP044419	75281	75307	Simple_repeat
CP044419	78402	78434	Simple_repeat
CP044419	78612	78656	Simple_repeat
CP044419	86675	86748	Simple_repeat
CP044419	87071	87114	Simple_repeat
CP044419	87801	87839	Simple_repeat
CP044419	94888	94917	Simple_repeat
CP044419	95022	95059	Simple_repeat
CP044419	96191	96237	Simple_repeat
CP044419	96193	96220	Simple_repeat
CP044419	96579	96612	Simple_repeat
CP044419	98764	98791	Simple_repeat
CP044419	98779	98827	Simple_repeat
CP044419	103650	103701	Simple_repeat
CP044419	103764	103811	Simple_repeat
CP044419	103934	103982	Simple_repeat
CP044419	104144	104196	Simple_repeat
CP044419	104752	104793	Simple_repeat
CP044419	106118	106203	Simple_repeat
CP044419	106525	106732	Simple_repeat
CP044419	107593	107655	Simple_repeat
CP044419	107595	107629	Simple_repeat
CP044419	108750	108821	Simple_repeat
CP044419	110389	110413	Simple_repeat
CP044419	115113	115159	Simple_repeat
CP044419	115367	115420	Simple_repeat
CP044419	115760	115788	Simple_repeat
CP044419	117776	117831	Simple_repeat
CP044419	127907	127934	Simple_repeat
CP044419	128210	128254	Simple_repeat
CP044419	128747	128803	Simple_repeat
CP044419	129713	129743	Simple_repeat
CP044419	137526	137658	Simple_repeat
CP044419	137659	137720	Simple_repeat
CP044419	137721	137735	Simple_repeat
CP044419	139077	139128	Simple_repeat
CP044419	140180	140234	Simple_repeat
CP044419	140965	141043	Simple_repeat
CP044419	140966	141036	Simple_repeat
CP044419	142048	142088	Simple_repeat
CP044419	144354	144372	Simple_repeat
CP044419	147549	147621	Simple_repeat
CP044419	154785	154842	Simple_repeat
CP044419	155699	155753	Simple_repeat
CP044419	156140	156191	Simple_repeat
CP044419	157618	157666	Simple_repeat
CP044419	158168	158207	Simple_repeat
CP044419	158276	158334	Simple_repeat
CP044419	159894	159936	Simple_repeat
CP044419	160047	160100	Simple_repeat
CP044419	162552	162591	Simple_repeat
CP044419	163352	163403	Simple_repeat
CP044419	164367	164424	Simple_repeat
CP044419	167836	167882	Simple_repeat
CP044419	175121	175156	Simple_repeat
CP044419	176014	176089	Simple_repeat
CP044419	176279	176309	Simple_repeat
CP044419	177954	178008	Simple_repeat
CP044419	178931	178952	Simple_repeat
CP044419	179267	179414	Simple_repeat
CP044419	182604	182636	Simple_repeat
CP044419	194389	194424	Simple_repeat
CP044419	195743	195808	Simple_repeat
CP044419	200300	200337	Simple_repeat
CP044419	200667	200705	Simple_repeat
CP044419	204142	204166	Simple_repeat
CP044419	204191	204229	Simple_repeat
CP044419	204619	204653	Simple_repeat
CP044419	205696	205772	Simple_repeat
CP044419	206048	206076	Simple_repeat
CP044419	206448	206487	Simple_repeat
CP044419	206511	206572	Simple_repeat
CP044419	207733	207795	Simple_repeat
CP044419	208197	208234	Simple_repeat
CP044419	208472	208549	Simple_repeat
CP044419	210401	210435	Simple_repeat
CP044419	210526	210559	Simple_repeat
CP044419	210822	210862	Simple_repeat
CP044419	211011	211036	Simple_repeat
CP044419	212596	212783	Simple_repeat
CP044419	212728	212824	Simple_repeat
CP044419	216176	216260	Simple_repeat
CP044419	216589	216638	Simple_repeat
CP044419	216959	217042	Simple_repeat
CP044419	216990	217043	Simple_repeat
CP044419	218853	218884	Simple_repeat
CP044419	219314	219349	Simple_repeat
CP044419	219559	219593	Simple_repeat
CP044419	219613	219654	Simple_repeat
CP044419	219925	219974	Simple_repeat
CP044419	220134	220174	Simple_repeat
CP044419	221468	221506	Simple_repeat
CP044419	221545	221598	Simple_repeat
CP044419	221790	221852	Simple_repeat
CP044419	222103	222302	Simple_repeat
CP044419	222582	222598	Simple_repeat
CP044419	222642	222685	Simple_repeat
CP044419	222757	222800	Simple_repeat
CP044419	224709	224776	Simple_repeat
CP044419	225161	225188	Simple_repeat
CP044419	225953	225998	Simple_repeat
CP044419	226146	226205	Simple_repeat
CP044419	227154	227244	Simple_repeat
CP044419	227180	227245	Simple_repeat
CP044419	227551	227598	Simple_repeat
CP044419	238692	238788	Simple_repeat
CP044419	240430	240483	Simple_repeat
CP044419	240962	240997	Simple_repeat
CP044419	244933	245006	Simple_repeat
CP044419	244935	245006	Simple_repeat
CP044419	245007	245039	Simple_repeat
CP044419	245995	246034	Simple_repeat
CP044419	246247	246298	Simple_repeat
CP044419	246465	246509	Simple_repeat
CP044419	247566	247619	Simple_repeat
CP044419	247992	248060	Unspecified
CP044419	249739	249820	Simple_repeat
CP044419	251948	252054	Simple_repeat
CP044419	253426	253480	Simple_repeat
CP044419	255775	255802	Simple_repeat
CP044419	256021	256050	Simple_repeat
CP044419	258097	258321	Simple_repeat
CP044419	258114	258336	Simple_repeat
CP044419	258827	258875	Simple_repeat
CP044419	262336	262405	Simple_repeat
CP044419	262341	262396	Simple_repeat
CP044419	262632	262658	Simple_repeat
CP044419	264829	264871	Simple_repeat
CP044419	267553	267611	Simple_repeat
CP044419	267589	267625	Simple_repeat
CP044419	267590	267614	Simple_repeat
CP044419	267670	267691	Simple_repeat
CP044419	267777	267822	Simple_repeat
CP044419	268983	269034	Simple_repeat
CP044419	268996	269042	Simple_repeat
CP044419	269043	269111	Unspecified
CP044419	269054	269120	Unspecified
CP044419	270418	270451	Simple_repeat
CP044419	271110	271149	Simple_repeat
CP044419	271901	271981	Simple_repeat
CP044419	272329	272369	Simple_repeat
CP044419	272873	272940	Simple_repeat
CP044419	272915	272969	Simple_repeat
CP044419	274378	274446	Simple_repeat
CP044419	274923	274955	Simple_repeat
CP044419	275285	275353	Unspecified
CP044419	275308	275373	Unspecified
CP044419	275315	275386	Unspecified
CP044419	275324	275395	Unspecified
CP044419	275336	275404	Unspecified
CP044419	275572	275609	Simple_repeat
CP044419	276423	276481	Simple_repeat
CP044419	276459	276502	Simple_repeat
[truncated: 3,508 more rows]

## Sheet: TABLE S9
TABLE S9 - Functional annotation comparison statistics between the assemblies
	CpIRef “before”	CpIRef “after”	CpIA	Ch30976	CtUGA55
Total # of predicted genes	3,886	4020	4424	3,996	4,037
Total # of protein encoding genes	3,805	3,944	3897	3,959	3986
Number of genes with GO ID	1,807	1,990	1883	2,001	1,716
Number of genes with EC ID	142	343	366	342	399
% uncharacterized proteins	40.02	33.62	32	34.55	34.74

## Sheet: TABLE S10
TABLE S10 - Transporter candidates for Cryptosporidium
Gene ID			Predicted FID	TransAAP			InterProScan	TCDB	TMHMM	SignalP	TrSSP	Phyre2				Protein_name	TransportDB
CpIA	CpIRef	Ch30976		FID	Substrate	TC	Description	Best hit	count	Yes/No	Yes/No	Head PDB	Confidence(%)	Sequence identity (%)	Alignment coverage (%)
CPATCC_0005990	cgd7_260	GY17_00003259	2-HCT	2-HCT	vacuolar iron uptake transporter homolog	2.A.24		gnl|TC-DB|E4TL47|2.A.89.1.3	4	N	Y	cell adhesion	69	23	21	VIT/Ccc1 family
CPATCC_0010700	cgd7_4800	GY17_00002365	AAAP	AAAP	amino acid	2.A.18	Transmembrane amino acid transporter protein		11	N	Y	transport protein	99.5	9	48	Amino acid transporter	*
CPATCC_0000080	cgd8_80	GY17_00002750	AAAP	AAAP	amino acid	2.A.18	Transmembrane amino acid transporter protein	gnl|TC-DB|P38176|2.A.18.6.10	10	N	Y	transport protein	100	13	86	Transmembrane amino acid transporter protein	*
CPATCC_0001220	cgd8_1170	GY17_00002860	AAAP	AAAP	amino acid	2.A.18	Transmembrane amino acid transporter protein		11	N	Y	transport protein	99.9	14	98	Amino acid permease like integral membrane protein, signal peptide plus 11 transmembrane domain	*
CPATCC_0003970	cgd8_3740	GY17_00000818	AAAP	AAAP	amino acid	2.A.18	Transmembrane amino acid transporter protein		11	N	Y	transport protein	100	12	88	Yer119cp like amino acid transporter	*
CPATCC_0004110	cgd8_3890	GY17_00000832	AAAP	AAAP	amino acid	2.A.18	Transmembrane amino acid transporter protein		12	N	Y	transport protein	99.8	12	97	Signal Peptide Uncharacterized transmembrane Protein
CPATCC_0023420	cgd5_1630	GY17_00003609	AAAP	AAAP	amino acid	2.A.18	Transmembrane amino acid transporter protein		11	N	Y	transport protein	99.9	14	98	Amino acid transporter
CPATCC_0019880	cgd4_2770	GY17_00001747	AAAP	AAAP	amino acid	2.A.18	Transmembrane amino acid transporter protein		10	N	Y	transport protein	99.9	14	96	Amino acid transporter
CPATCC_0021710	cgd4_4450	GY17_00003406	AAAP	AAAP	amino acid	2.A.18	Transmembrane amino acid transporter protein		11	N	Y	transport protein	99.9	15	84	Transmembrane amino acid transporter protein	*
CPATCC_0031350	cgd3_470	GY17_00003844	AAAP	AAAP	amino acid	2.A.18	Transmembrane amino acid transporter protein		10	N	Y	transport protein	99.9	10	97	Transmembrane amino acid transporter protein	*
CPATCC_0035370	cgd3_4350	GY17_00003952	AAAP	AAAP	amino acid	2.A.18	Transmembrane amino acid transporter protein		11	N	Y	transport protein	99.9	14	89	Amino acid transporter	*
CPATCC_0008540	cgd7_2730	GY17_00002073	ABC	ABC	multidrug	3.A.1	ABC transporter	gnl|TC-DB|Q6NLC1|3.A.1.203.8	3	N	Y	membrane protein	100	18	89	ABC transporter	*
CPATCC_0010390	cgd7_4510	GY17_00002334	ABC	ABC	multidrug	3.A.1	ABC transporter		9	N	Y	transport protein	100	33	98	ABC transporter
CPATCC_0010400	cgd7_4520	GY17_00002335	ABC	ABC	multidrug	3.A.1	ABC transporter	gnl|TC-DB|O15439|3.A.1.208.7	10	N	Y	transport protein	100	29	97	ABC transporter integral membrane type-1 fused domain containing protein	*
CPATCC_0016330	cgd6_4700	GY17_00000492	ABC	ABC	multidrug	3.A.1	ABC transporter	gnl|TC-DB|Q8T9W4|3.A.1.201.23	8	N	Y	hydrolase,protein transport	100	29	99	ATP-binding cassette, ABC transporter-type
CPATCC_0016960	cgd6_5350	GY17_00000559	ABC	ABC	White pigment protein homolog (ABCG)	3.A.1	ABC transporter		7	N	Y	transport protein	100	30	93	ABC transporter protein
CPATCC_0017060	cgd6_5450	GY17_00003967	ABC	ABC	White pigment protein homolog (ABCG)	3.A.1	ABC transporter		6	N	Y	transport protein	100	32	93	ABC transporter	*
CPATCC_0018490	cgd4_1370	GY17_00003702	ABC	ABC	multidrug	3.A.1	ABC transporter		11	N	Y	transport protein	100	18	99	ABC transporter	*
CPATCC_0018500	cgd4_1380	GY17_00003701	ABC	ABC	manganese/zinc ion	3.A.1	ABC transporter	gnl|TC-DB|Q9P5N0|3.A.1.208.28	14	N	Y	transport protein	100	19	99	ABC transporter	*
CPATCC_0018510	cgd4_1390	GY17_00003700	ABC	ABC	phosphonate	3.A.1	ABC transporter		12	N	Y	transport protein	100	18	99	ABC transporter	*
CPATCC_0021700	cgd4_4440	GY17_00003405	ABC	ABC	toxin secretion	3.A.1	ABC transporter		9	N	Y	transport protein	100	20	99	ABC transporter
CPATCC_0030450	cgd2_60	GY17_00003682	ABC	ABC	toxin secretion	3.A.1	ABC transporter		10	N	Y	transport protein	100	23	99	ABC transporter
CPATCC_0030460	cgd2_70	GY17_00003681	ABC	ABC	multidrug	3.A.1	ABC transporter		11	N	Y	transport protein	100	26	99	ABC transporter	*
CPATCC_0030470	cgd2_80	GY17_00003680	ABC	ABC	multidrug	3.A.1	ABC transporter		11	N	Y	transport protein	100	19	99	ABC transporter family protein	*
CPATCC_0030480	cgd2_90	GY17_00003679	ABC	ABC	multidrug	3.A.1	ABC transporter		9	N	Y	transport protein	100	26	98	ABC transporter	*
CPATCC_0026930	cgd2_3870	GY17_00003559	ABC	ABC	cobalamin/Fe3+-siderophores	3.A.1	ABC transporter		11	N	Y	transport protein	100	23	99	ABC transporter	*
CPATCC_0031280	cgd3_410	GY17_00003837	ABC	ABC	toxin secretion	3.A.1	ABC transporter		12	N	Y	transport protein	100	24	98	ABC transporter	*
CPATCC_0031630	cgd3_690	GY17_00003957	ABC	ABC	branched-chain amino acid	3.A.1	ABC transporter		9	N	Y	transport protein	100	23	99	ABC transporter type 1	*
CPATCC_0038680	cgd1_700	GY17_00001071	ABC	ABC	multidrug	3.A.1	ABC transporter	gnl|TC-DB|Q9N2N3|3.A.1.208.27	8	N	Y	transport protein	100	30	97	ABC transporter
CPATCC_0038000	cgd1_1350	GY17_00001140	ABC	ABC	unknown substrate	3.A.1	ABC transporter	gnl|TC-DB|O75027|3.A.1.210.4	4	N	Y	transport protein/hydrolase	100	25	98	ATM1-like ABC transporter	*
CPATCC_0009920	cgd7_4070	GY17_00002287	ArsAB	ArsAB	arsenite (ArsA)	3.A.4			0	N	Y	hydrolase	100	25	93	Arsenical pump ATPase, ArsA/GET3
CPATCC_0034530	cgd3_3520	GY17_00002581	CaCA	CaCA	sodium ion:calcium ion+potassium ion antiporter	2.A.19			11	Y	Y	metal transport	100	41	88	Sodium/calcium exchanger protein	*
CPATCC_0036710	cgd1_2620	GY17_00001270	CaCA	CaCA	proton:calcium ion antiporter	2.A.19		gnl|TC-DB|B6ZCF4|2.A.19.2.6	11	N	Y	membrane protein/metal transport	100	42	86	Sodium/calcium exchanger protein	*
CPATCC_0036240	cgd1_3050	GY17_00001317	CDF	CDF	cation efflux	2.A.4	CDF: cation diffusion facilitator family transporter		6	N	Y	metal transport	100	20	89	Cation efflux protein	*
CPATCC_0011610	cgd6_130	GY17_00000014	CPA1	CPA1	sodium ion:proton antiporter	2.A.36			10	N	Y	membrane protein	100	17	49	Cation/H+ exchanger (CPA1)
CPATCC_0011620	cgd6_140	GY17_00000015	CPA1	CPA1	sodium ion:proton antiporter	2.A.36			12	N	Y	membrane protein	100	19	45	Cation/H+ exchanger (CPA1)
CPATCC_0037160	cgd1_2190	GY17_00001224	CPA2	CPA2	potassium/sodium ion:proton antiporter	2.A.37			14	Y	Y	transport protein	100	20	43	K+/H+ antiporte	*
CPATCC_0036780	cgd1_2550	GY17_00001263	Ctr	Ctr	copper ion uptake	1.A.56	Ctr copper transporter family		3	N	Y	metal transport	98.3	38	14	Ctr copper transporter	*
CPATCC_0001500	cgd8_1440	GY17_00000570	DMT	DMT	phosphate:phosphoenolpyruvate translocator	2.A.7	Triose-phosphate Transporter family		9	N	Y	membrane protein	99.9	12	71	Triose-phosphate Transporter	*
CPATCC_0011800	cgd6_320	GY17_00000034	DMT	DMT	drug/metabolite	2.A.7	Magnesium transporter NIPA		9	Y	N	membrane protein	99	13	52	Magnesium transporter NIPA
CPATCC_0016520	cgd6_4890	GY17_00000514	DMT	DMT	drug/metabolite	2.A.7	CRT-like, chloroquine-resistance transporter-like	gnl|TC-DB|Q9GSB0|2.A.7.20.2	9	N	Y	membrane protein	99.3	14	78	Chloroquine resistance transporter
CPATCC_0022840	cgd5_1020	GY17_00002985	DMT	DMT	drug/metabolite	2.A.7	Magnesium transporter NIPA	gnl|TC-DB|W7FSC1|2.A.7.29.2	9	N	Y	membrane protein	99.4	11	62	Magnesium transporter NIPA
CPATCC_0026160	cgd5_3410	GY17_00001623	DMT	DMT	phosphate:phosphoenolpyruvate translocator	2.A.7	Triose-phosphate Transporter family		9	N	Y	membrane protein	99.9	9	61	Triose-phosphate Transporter family	*
CPATCC_0019510	cgd4_3110	GY17_00001785	DMT	DMT	phosphate:phosphoenolpyruvate translocator	2.A.7	Triose-phosphate Transporter family		8	N	Y	membrane protein	99.8	16	54	Sugar phosphate transporter domain containing protein	*
CPATCC_0030270	cgd2_590	GY17_00003419	DMT	DMT	nucleotide-sugar	2.A.7	Nucleotide-sugar transporter	gnl|TC-DB|O16658|2.A.7.12.9	10	N	Y	membrane protein	99.9	12	69	Nucleotide-sugar transporter	*
CPATCC_0028130	cgd2_2660	GY17_00002221	DMT	DMT	nucleotide-sugar	2.A.7	Nucleotide-sugar transporter	gnl|TC-DB|Q9Y2D2|2.A.7.12.7	10	N	Y	membrane protein	99.9	15	69	UDP N-acetylglucosamine transporter-like nucleotide sugar transporter	*
CPATCC_0028120	cgd2_2670	GY17_00002222	DMT	DMT	nucleotide-sugar	2.A.7	Nucleotide-sugar transporter	gnl|TC-DB|O16658|2.A.7.12.9	10	N	Y	membrane protein	99.7	14	74	UDP N-acetylglucosamine transporter-like nucleotide sugar transporter	*
CPATCC_0031380	cgd3_490	GY17_00003847	DMT	DMT	GDP-fucose	2.A.7	Triose-phosphate Transporter family		7	N	Y	membrane protein	99.9	11	73	GDP-fucose transporter	*
CPATCC_0031390	cgd3_500	GY17_00003848	DMT	DMT	phosphate:phosphoenolpyruvate translocator	2.A.7	Triose-phosphate Transporter family		7	N	Y	membrane protein	99.9	11	80	GDP-fucose transporter	*
CPATCC_0031400	cgd3_510	GY17_00003849	DMT	DMT	phosphate:phosphoenolpyruvate translocator	2.A.7	Triose-phosphate Transporter family		8	N	Y	membrane protein	99.9	15	79	GDP-fucose transporter	*
CPATCC_0039370	cgd1_40	GY17_00000999	DMT	DMT	phosphate:phosphoenolpyruvate translocator	2.A.7	UAA transporter family	gnl|TC-DB|P78383|2.A.7.11.1	9	N	Y	membrane protein	100	8	85	UDP-galactose transporter/UAA transporter	*
CPATCC_0030700	cgd2_310	GY17_00003657	ENT	ENT	nucleoside	2.A.57	Nucleoside transporter		10	N	Y	transport protein	99	12	93	Equilibrative nucleoside transporter	*
CPATCC_0010940	cgd7_5000	GY17_00002386	F-ATPase	F-ATPase	protons	3.A.2			0	N	Y	hydrolase	100	62	98	Vacuolar ATP synthase subunit A	*
CPATCC_0000380	cgd8_360	GY17_00002780	F-ATPase	F-ATPase	protons	3.A.2			0	N	N	hydrolase	100	36	98	vacuolar ATP synthase subunit E
CPATCC_0001760	cgd8_1670	GY17_00000596	F-ATPase	F-ATPase	protons	3.A.2			0	N	Y	hydrolase	100	74	92	Vacuolar ATP synthase subunit B	*
CPATCC_0005040	cgd8_4790	GY17_00000928	F-ATPase	F-ATPase	protons	3.A.2		gnl|TC-DB|G5EDB8|3.A.2.2.7	4	N	Y	hydrolase	100	22	92	Vacuolar ATP synthase subunit	*
CPATCC_0012060	cgd6_610	GY17_00000059	F-ATPase	F-ATPase	protons	3.A.2			0	N	Y	hydrolase	100	53	76	ATP synthase subunit alpha
CPATCC_0022330	cgd5_530	GY17_00002934	F-ATPase	F-ATPase	protons	3.A.2			0	N	Y	hydrolase	100	44	81	ATPase V1 complex subunit D	*
CPATCC_0022650	cgd5_850	GY17_00002967	F-ATPase	F-ATPase	protons	3.A.2			0	N	N	hydrolase	100	46	85	V-type proton ATPase subunit F	*
CPATCC_0026090	cgd5_3340	GY17_00001616	F-ATPase	F-ATPase	protons	3.A.2			0	N	Y	hydrolase	100	37	98	vacuolar ATP synthase subunit d	*
CPATCC_0017660	cgd4_540	GY17_00003173	F-ATPase	F-ATPase	protons	3.A.2			0	N	N	Vacuolar ATP synthase subunit C	100	28	95	V-type proton ATPase subunit C	*
CPATCC_0018590	cgd4_1470	GY17_00001877	F-ATPase	F-ATPase	protons	3.A.2		gnl|TC-DB|Q3SDC6|3.A.2.2.8	6	N	Y	hydrolase	100	30	97	V-type proton ATPase subunit a	*
CPATCC_0018860	cgd4_3723	GY17_00001850	F-ATPase	F-ATPase	protons	3.A.2			2	N	Y	motor protein	98	19	72	ATPase V0 complex subunit e1/e2
CPATCC_0029490	cgd2_1360	GY17_00003496	F-ATPase	F-ATPase	protons	3.A.2			0	N	Y	hydrolase	100	62	88	ATP synthase subunit beta
CPATCC_0026830	cgd2_3960	GY17_00003569	F-ATPase	F-ATPase	protons	3.A.2			0	N	N	ARM repeat	100	19	93	V-ATPase subunit H	*
CPATCC_0038880	cgd1_520	GY17_00001051	F-ATPase	F-ATPase	protons	3.A.2		gnl|TC-DB|P59227|3.A.2.2.5	4	N	Y	hydrolase	100	53	91	V-type proton ATPase proteolipid subunit	*
CPATCC_0038860	cgd1_540	GY17_00001053	F-ATPase	F-ATPase	protons	3.A.2		gnl|TC-DB|Q03105|9.B.16.1.2	4	Y	Y	hydrolase	100	47	90	V-type proton ATPase proteolipid subunit	*
CPATCC_0032160	cgd3_1210	GY17_00002643	HCC	HCC	hemolysin C (HlyC) homolog	9.A.40			4	N	Y	transport protein	100	12	51	uncharacterized protein
CPATCC_0006690	cgd7_950	GY17_00001884	IISP	IISP	No Subtype	3.A.5		gnl|TC-DB|Q9H9S3|3.A.5.9.1	8	Y	Y	ribosome	100	68	98	SecY/Sec61 signal peptide plus 9 transmembrane domain-containing protein	*
CPATCC_0030230	cgd2_630	GY17_00003423	IRK-C	IRK-C	ATP-sensitive inward rectifier potassium ion channel	1.A.2			3	N	Y	metal transport	100	21	84	Inward rectifier potassium channel
CPATCC_0001260	cgd8_1210	GY17_00002864	MC	MC	unknown substrate	2.A.29		gnl|TC-DB|P12236|2.A.29.1.10	4	N	Y	transport protein	100	44	96	Adenine nucleotide translocator 1/Mitochondrial carrier protein	*
CPATCC_0013870	cgd6_2350	GY17_00000239	MC	MC	unknown substrate	2.A.29		gnl|TC-DB|Q70HW3|2.A.29.18.3	3	N	Y	transport protein	100	13	95	Mitochondrial carrier protein	*
CPATCC_0015490	cgd6_3880	GY17_00000405	MC	MC	unknown substrate	2.A.29		gnl|TC-DB|Q8TBP6|2.A.29.14.6	2	N	Y	transport protein	100	14	98	Mitochondrial carrier protein	*
CPATCC_0017200	cgd4_100	GY17_00003219	MC	MC	unknown substrate	2.A.29			3	N	Y	Mitochondrial carrier	100	15	93	Mitochondrial carrier protein
CPATCC_0030340	cgd2_520	GY17_00003692	MC	MC	unknown substrate	2.A.29		gnl|TC-DB|Q8VEM8|2.A.29.4.5	1	N	Y	transport protein	100	18	95	Mitochondrial carrier protein	*
CPATCC_0029810	cgd2_1030	GY17_00003465	MC	MC	unknown substrate	2.A.29		gnl|TC-DB|P10566|2.A.29.5.1	2	N	Y	transport protein	100	18	97	Mitochondrial carrier protein
CPATCC_0038790	cgd1_600	GY17_00001060	MC	MC	unknown substrate	2.A.29			0	N	Y	transport protein	100	17	97	Oxoglutarate/malate translocator protein
CPATCC_0036970	cgd1_2370	GY17_00001244	MC	MC	unknown substrate	2.A.29		gnl|TC-DB|Q4A3R4|2.A.29.10.3	4	N	Y	Mitochondrial carrier	100	16	95	Mitochondrial carrier domain containing protein	*
CPATCC_0009260	cgd7_3450	GY17_00003062	MFS	MFS	multidrug efflux	2.A.1			12	N	Y	MFS general substrate transporter	100	14	97	Major facilitator superfamily (MFS5)
CPATCC_0010170	cgd7_4290	GY17_00002311	MFS	MFS	glycerol-3-phosphate	2.A.1		gnl|TC-DB|S8G252|2.A.1.66.4	10	N	Y	MFS general substrate transporter	100	12	89	Major facilitator superfamily domain containing protein	*
CPATCC_0001690	cgd8_1600	GY17_00000589	MFS	MFS	multidrug efflux	2.A.1			10	N	Y	MFS general substrate transporter	100	19	82	Sugar phosphate permease	*
CPATCC_0004130	cgd8_3910	GY17_00000834	MFS	MFS	glycerol-3-phosphate	2.A.1			12	N	Y	MFS general substrate transporter	100	15	86	Major facilitator superfamily (MFS) domain containing protein	*
CPATCC_0011920	cgd6_470	GY17_00000046	MFS	MFS	Acetyl-CoA:CoA antiporter	2.A.1	Acetyl-coenzyme A transporter 1	gnl|TC-DB|O00400|2.A.1.25.1	10	N	N	MFS general substrate transporter	99.5	9	89	Acetyl-coenzyme A transporter 1
CPATCC_0013860	cgd6_2340	GY17_00000238	MFS	MFS	multidrug efflux	2.A.1			10	N	N	transferase	40.5	35	2	Major facilitator superfamily protein
CPATCC_0022080	cgd5_280	GY17_00002910	MFS	MFS	nitrate	2.A.1			6	N	N	MFS general substrate transporter	77.6	9	62	Major facilitator superfamily domain containing protein
CPATCC_0017500	cgd4_380	GY17_00003189	MFS	MFS	oxalate:formate antiporter	2.A.1			12	N	Y	transport protein/immune system	100	11	98	Major facilitator superfamily domain containing protein
CPATCC_0019780	cgd4_2870	GY17_00001758	MFS	MFS	multidrug efflux	2.A.1	Sugar transporter signature		12	N	Y	transport protein	100	19	98	sugar transporter-like protein
CPATCC_0021360	cgd4_4050	GY17_00003370	MFS	MFS	nitrate/nitrite	2.A.1			12	N	Y	MFS general substrate transporter	100	13	75	MFS	*
CPATCC_0030050	cgd2_800	GY17_00003441	MFS	MFS	multidrug efflux	2.A.1			9	N	Y	MFS general substrate transporter	100	19	94	Major facilitator superfamily	*
CPATCC_0029540	cgd2_1310	GY17_00003492	MFS	MFS	multidrug efflux	2.A.1			11	N	Y	MFS general substrate transporter	100	8	95	Major facilitator superfamily domain containing protein
CPATCC_0029370	cgd2_1450	GY17_00002095	MFS	MFS	multidrug efflux	2.A.1			12	N	Y	transport protein/immune system	100	16	88	unspecified product
CPATCC_0031430	cgd3_540	GY17_00003852	MFS	MFS	multidrug efflux	2.A.1			12	N	N	MFS general substrate transporter	99.9	11	97	Major facilitator superfamily domain containing protein
CPATCC_0031440	cgd3_550	GY17_00003853	MFS	MFS	tetracycline efflux	2.A.1			12	N	Y	transport protein, membrane protein	100	13	87	Major Facilitator Superfamily
CPATCC_0034130	cgd3_3100	GY17_00002539	MFS	MFS	glycerol-3-phosphate	2.A.1			11	N	Y	MFS general substrate transporter	100	15	88	Major Facilitator Superfamily	*
CPATCC_0035080	cgd3_4070	GY17_00003803	MFS	MFS	multidrug efflux	2.A.1	Sugar transporter signature	gnl|TC-DB|O97467|2.A.1.1.24	12	N	Y	transport protein	100	14	99	Sugar/inositol transporter	*
CPATCC_0026640	cgd2_4140	GY17_00003754	MPT	MPT	inner membrane translocase (import) Tim17	3.A.8		gnl|TC-DB|P39515|3.A.8.1.1	3	N	Y	oxidoreductase	99.9	19	76	Mitochondrial import inner membrane translocase subunit tim17	*
CPATCC_0010730	cgd7_4830	GY17_00002368	MscS	MscS	small-conductance mechanosensitive ion channel	1.A.23			5	N	N	membrane protein	100	16	24	Mechanosensitive ion channel MscS containing protein	*
CPATCC_0011570	cgd6_90	GY17_00000010	MscS	MscS	small-conductance mechanosensitive ion channel	1.A.23			4	N	N	membrane protein	100	16	31	Mechanosensitive ion channel	*
CPATCC_0023080	cgd5_1270	GY17_00003575	NSCC2	NSCC2	preprotein translocase Sec62	1.A.15		gnl|TC-DB|A5K427|1.A.15.1.3	3	N	Y	"Winged helix" DNA-binding domain	97.6	18	31	Translocation protein Sec62	*
CPATCC_0006200	cgd7_460	GY17_00003280	P-ATPase	P-ATPase	calcium ion	3.A.3		gnl|TC-DB|Q5CYZ4|3.A.3.10.5	13	N	Y	hydrolase/transport protein	100	21	80	P-type cation-transporting ATPase	*
CPATCC_0007540	cgd7_1760	GY17_00001970	P-ATPase	P-ATPase	phospholipid	3.A.3			10	N	Y	hydrolase/transport protein	100	19	97	Haloacid dehalogenase-like hydrolase/Phospholipid-transporting ATPase	*
CPATCC_0010060	cgd7_4190	GY17_00002300	P-ATPase	P-ATPase	calcium ion	3.A.3	Cation transporter/ATPase, N-terminus		9	N	Y	hydrolase	100	50	97	Cation-transporting P-type Atpase	*
CPATCC_0002200	cgd8_2090	GY17_00000640	P-ATPase	P-ATPase	calcium ion	3.A.3	P5-type ATPase cation transporter	gnl|TC-DB|Q5CW06|3.A.3.10.14	8	N	Y	hydrolase/transport protein	100	20	81	P-type ATPase, transmembrane domain containing protein	*
CPATCC_0012170	cgd6_720	GY17_00000070	P-ATPase	P-ATPase	calcium ion	3.A.3		gnl|TC-DB|Q7SXR0|3.A.3.10.2	5	N	Y	hydrolase/transport protein	100	18	99	P-type ATPase A domain containing protein
CPATCC_0019930	cgd4_2720	GY17_00001742	P-ATPase	P-ATPase	calcium ion/manganese ion	3.A.3	Cation transporter/ATPase, N-terminus		8	N	Y	hydrolase/transport protein	100	30	85	p-type Atpase	*
CPATCC_0028410	cgd2_2400	GY17_00002193	P-ATPase	P-ATPase	phospholipid	3.A.3			8	N	Y	hydrolase/transport protein	100	21	95	P-type ATPase A domain containing protein
CPATCC_0028110	cgd2_2680	GY17_00002223	P-ATPase	P-ATPase	calcium ion	3.A.3		gnl|TC-DB|Q5CTJ9|3.A.3.10.18	12	N	Y	hydrolase/transport protein	100	18	81	cation transport Atpase
CPATCC_0026520	cgd2_4240	GY17_00003766	P-ATPase	P-ATPase	calcium ion	3.A.3			10	N	Y	hydrolase/transport protein	100	18	84		*
CPATCC_0033740	cgd3_2730	GY17_00002499	P-ATPase	P-ATPase	phospholipid	3.A.3		gnl|TC-DB|P98200|3.A.3.8.8	10	N	Y	hydrolase/transport protein	100	19	91	Phospholipid-transporting ATPase	*
CPATCC_0034750	cgd3_3740	GY17_00003934	P-ATPase	P-ATPase	zinc/cadmium/cobalt ion	3.A.3			6	N	Y	hydrolase, membrane protein	100	26	71	p-type ATPase 2
CPATCC_0035160	cgd3_4140	GY17_00003810	P-ATPase	P-ATPase	calcium ion	3.A.3		gnl|TC-DB|F0WRI8|3.A.3.10.10	13	N	Y	hydrolase/transport protein	100	19	78	p-type Atpase A	*
CPATCC_0012290	cgd6_840	GY17_00000082	Presenilin	Presenilin	unknown substrate	1.A.54		gnl|TC-DB|A7KX19|1.A.54.3.4	10	N	Y	membrane protein	99.1	21	69	Peptidase A22B, signal peptide peptidase
CPATCC_0007120	cgd7_1380	GY17_00001927	PUP	PUP	peptide uptake	9.A.18		gnl|TC-DB|P0AFY6|9.A.18.1.1	5	N	Y	ABC transporter transmembrane region	100	8	96	SbmA/BacA-like/ABC transporter type 1	*
CPATCC_0007130	cgd7_1390	GY17_00001928	PUP	PUP	peptide uptake	9.A.18		gnl|TC-DB|P0AFY6|9.A.18.1.1	6	N	N	transport protein/hydrolase	100	14	95	SbmA/BacA-like protein	*
CPATCC_0026340	cgd5_3580	GY17_00001641	PUP	PUP	peptide uptake	9.A.18		gnl|TC-DB|Q9KI15|9.A.18.1.4	4	N	Y	ABC transporter transmembrane region	100	11	96	SbmA/BacA-like family (ABC transporter)	*
CPATCC_0026350	cgd5_3590	GY17_00001642	PUP	PUP	peptide uptake	9.A.18		gnl|TC-DB|B6AF79|9.A.18.1.3	5	N	Y	transport protein/hydrolase	100	10	98	SbmA/BacA-like family (ABC transporter)	*
CPATCC_0006590	cgd7_850	GY17_00003320	RND	RND	Patched (Ptc) segmentation polarity protein homolog	2.A.6			10	N	Y	membrane protein	100	24	88	Patched family protein/Sterol-sensing domain-containing protein
CPATCC_0026410	cgd2_4350	GY17_00003777	RND	RND	Patched (Ptc) segmentation polarity protein homolog	2.A.6			10	N	Y	membrane protein	100	24	86	Patched family protein	*
CPATCC_0005810	cgd7_90	GY17_00003242	SulP	SulP	sulfate	2.A.53	STAS_SulP_like_sulfate_transporter		9	N	Y	transport protein	100	23	86	SLC26A/SulP transporter
CPATCC_0020600	cgd4_2100	GY17_00001674	Trk	Trk	potassium ion uptake	2.A.38			1	N	Y	transferase	100	16	84	Glycosyl transferase family 1/GPI anchor biosynthesis related protein
CPATCC_0013650	cgd6_2140	GY17_00000217	VIC	VIC	potassium ion channel	1.A.1			3	N	N	membrane protein	100	19	88	Potassium channel domain containing protein
CPATCC_0014070	cgd6_2520	GY17_00000259	VIC	VIC	potassium ion channel	1.A.1			3	N	N	membrane protein	99.6	14	64	Ion transport domain containing protein
CPATCC_0033050	cgd3_2080	GY17_00002732	VIC	VIC	potassium ion channel	1.A.1			9	N	N	membrane protein	99.9	15	16	Potassium channel domain containing protein	*
CPATCC_0005140	cgd8_4880	GY17_00000938	ZIP	ZIP	zinc ion	2.A.5			4	N	N	membrane protein	61.3	30	8	Uncharacterized transmembrane Protein
CPATCC_0011940	cgd6_490	GY17_00000048	ZIP	ZIP	zinc ion	2.A.5	ZIP Zinc transporter	gnl|TC-DB|Q5CXM3|2.A.5.3.7	8	N	Y	membrane protein	63.4	13	14	Zinc ZIP transporter protein	*
CPATCC_0023930	cgd5_2150	GY17_00003890	ZIP	ZIP	zinc ion	2.A.5	ZIP Zinc transporter		8	Y	Y	Mitochondrial cytochrome c oxidase subunit IV	25.3	13	10	ZIP Zinc transporter	*
CPATCC_0029300	cgd2_1520	GY17_00002102	MIT	MIT	MITmagnesium/cobalt ion	1.A.35	Magnesium transporter MRS2-like	gnl|TC-DB|Q93ZD7|1.A.35.5.4	2	N	N	metal transport	100	26	35	CorA family mitochondrial membrane protein
CPATCC_0033410	cgd3_2423	GY17_00002467	MIT	MIT	magnesium/cobalt ion	1.A.35	Magnesium transporter MRS2-like	gnl|TC-DB|Q9HD23|1.A.35.5.7	2	N	N	metal transport	100	19	54	Uncharacterized protein
							InterPro entry
CPATCC_0013530	cgd8_20230	GY17_00000206	Putative Transporter	FBT	sugar	2.A.71		gnl|TC-DB|Q9SKZ5|2.A.71.2.2	10	N	Y	MFS general substrate transporter	100	12	96	Folate-biopterin transporter
CPATCC_0013340	cgd6_1840	GY17_00000188	Putative Transporter	HCC	hemolysin C (HlyC) homolog	9.A.40			5	N	Y	transport protein	100	23	42	CBS/Cyclin M2-like membrane-associated protein	*
CPATCC_0030310	cgd2_550	GY17_00003415	Putative Transporter	LCT	unknown substrate	2.A.43			7	N	Y	transport protein	100	87	87	Mannose-P-dolichol utilization defect 1-like protein with PQ-loop repeat
CPATCC_0005520	cgd8_5220	GY17_00000976	Putative Transporter	CaCA	sodium ion:calcium ion+potassium ion antiporter	2.A.19	OST3 / OST6 family, transporter family	gnl|TC-DB|J9IZT7|1.A.76.1.5	5	Y	Y	oxidoreductase	100	44	44	OST3 / OST6 family, transporter family	*
CPATCC_0008400	cgd7_2583	GY17_00002059	Putative Transporter	DMT	phosphate:phosphoenolpyruvate translocator	2.A.7	Triose-phosphate Transporter family		9	N	N	transferase	100	38	38	Polysaccharide pyruvyl transferase
CPATCC_0001420	cgd8_1370	GY17_00002880	Putative Transporter	DMT	phosphate:phosphoenolpyruvate translocator	2.A.7	Triose-phosphate Transporter family		9	N	Y	membrane protein	99.9	71	71	GDP-fucose transporter with 9 transmembrane domains	*
CPATCC_0006060	cgd7_330	GY17_00003266	Putative Transporter					gnl|TC-DB|F1R852|8.A.68.1.8	9	Y	N	membrane protein	61.6	26	26	Endomembrane protein 70 Nonaspanin (TM9SF)
CPATCC_0008940	cgd7_3130	GY17_00003030	Putative Transporter				Endoplasmic reticulum vesicle transporter		2	N	Y	protein transport	100	66	66	ER vesicle protein Erv41p transporter
CPATCC_0009710	cgd7_3880	GY17_00003109	Putative Transporter					gnl|TC-DB|Q9UGP8|3.A.5.9.1	4	N	N	hydrolase	100	51	51	DnaJ/Sec63 domain containing protein	*
CPATCC_0001730	cgd8_1640	GY17_00000593	Putative Transporter					gnl|TC-DB|Q5CW48|9.A.49.1.11	3	N	Y	membrane protein	26.4	38	38	PRA1 family protein
CPATCC_0002440	cgd8_2330	GY17_00000665	Putative Transporter					gnl|TC-DB|Q07600|3.D.2.4.1	13	Y	Y	membrane protein	100	40	40	Pyridine nucleotide/ NAD(P) transhydrogenase alpha plus beta subunit
CPATCC_0003040	cgd8_2900	GY17_00000726	Putative Transporter				Endoplasmic reticulum vesicle transporter		2	N	Y	protein transport	100	73	73	Endoplasmic reticulum vesicle transporter
CPATCC_0005570	cgd8_5270	GY17_00000981	Putative Transporter				Amino acid permease		11	N	Y	transport protein	100	95	95	Amino acid permease/polyamine transporter I
CPATCC_0016880	cgd6_5260	GY17_00000551	Putative Transporter				ABC transporter		0	N	Y	hydrolase,protein transport	100	98	98	ABC transporter ATpase with 2 AAA domains
CPATCC_0022140	cgd5_360	GY17_00002916	Putative Transporter					gnl|TC-DB|Q9LTW0|8.A.27.1.4	2	N	N	membrane protein	49.2	9	9	CDC50/LEM3 protein
CPATCC_0024030	cgd5_2240	GY17_00001408	Putative Transporter					gnl|TC-DB|M2X0J8|9.B.146.1.5	11	N	Y	transferase	100	89	89	Glycosyl transferase family 4
CPATCC_0017540	cgd4_420	GY17_00003185	Putative Transporter					gnl|TC-DB|Q9HC07|2.A.106.2.2	3	N	Y	membrane protein	78.7	23	23	Gdt1 family
CPATCC_0019860	cgd4_2790	GY17_00001749	Putative Transporter					gnl|TC-DB|Q9Y6K0|4.F.1.1.1	9	N	Y	transferase	99.7	50	50	CDP-alcohol phosphatidyltransferase
CPATCC_0030320	cgd2_540	GY17_00003414	Putative Transporter				Organic solute transporter Ostalpha		6	N	N	protein binding	93.4	5	5	Organic solute transporter Ostalpha
CPATCC_0028620	cgd2_2190	GY17_00002172	Putative Transporter					gnl|TC-DB|Q8R173|9.B.37.2.1	4	N	Y	apoptosis	89	7	7	DHHC palmitoyltransferase
CPATCC_0026560	cgd2_4200	GY17_00003762	Putative Transporter				Organic solute transporter Ostalpha	gnl|TC-DB|Q9Y519|2.A.82.1.3	7	N	N	ligase, dna binding protein	45.2	4	4	Organic solute transporter subunit alpha/Transmembrane protein 184
CPATCC_0038360	cgd1_990	GY17_00001104	Putative Transporter					gnl|TC-DB|Q07600|3.D.2.4.1	12	Y	Y	membrane protein	100	39	39	Pyridine nucleotide/ NAD(P) transhydrogenase alpha plus beta subunit
CPATCC_0037970	cgd1_1380	GY17_00001143	Putative Transporter					gnl|TC-DB|D8TVC8|9.B.37.2.2	4	N	N	apoptosis	92.9	8	8	Palmitoyltransferase
CPATCC_0003850	cgd8_3640	GY17_00000806	Putative Transporter						12	N	Y	membrane protein	100	89	89	Niemann-Pick type C1 disease protein/ patched like cholesterol transporter of the SecD family
FID: Transporter family name provided by Transporter Classification Database
TC: Transporter Classification code provoded by Transporter Classification (TC) system which is analogous to the Enzyme Commission (EC) system
TrSSP: Transporter Substrate Specificity Prediction Server that implements SVM model
Phyre2:Protein structure based protein homology recognition tool
Protein_name: Protein names are given based on functional annotation results.
*: Transporter records exist in TransportDB
Transporter_w/predicted FID:High confident transporters. Results from different transporter prediction methods are consistent with each other(except TrSSP which is slightly biased due to bias in transporter databases used in the machine learning training);
Transporter_putative transporters: Transporters with unclassified substrates or inconsistent predictions results from different methods are listed in Transporter_partB.

[truncated: 4 more sheets: TABLE S11, TABLE S12, TABLE S13, TABLE S14]
